# Supplementary material for: Discovery and In Vivo Efficacy of Trace Amine-Associated Receptor 1 (TAAR1) Agonist 4-(2-Aminoethyl)-N-(3,5-dimethylphenyl)piperidine-1-carboxamide Hydrochloride (AP163) for the Treatment of Psychotic Disorders
Source: MDPI journal article supplement (doi:10.3390/ijms231911579), 2022-09-30
Supplement: s1 [file s1]

Supplementary Information for

**Discovery and In Vivo Efficacy of Trace Amine-Associated Receptor 1 (TAAR1) Agonist 4-(2-aminoethyl)-N-(3,5-dimethylphenyl)piperidine-1-carboxamide Hydrochloride (AP163) for the Treatment of Psychotic Disorders**

Mikhail Krasavin\*, Anatoly A. Peshkov, Alexey Lukin, Kristina Komarova, Lyubov Vinogradova, Daria Smirnova, Diana Gapanenok, Evgeny V. Kanov, Savelii R. Kuvarzin, Ramilya Z. Murtazina, Evgeniya V. Efimova, Maxim Gureev, Kirill Onokhin, Konstantin Zakharov and Raul R. Gainetdinov\*

*Contents*

|                                                                                       |       |
|---------------------------------------------------------------------------------------|-------|
| Copies of <sup>1</sup> H and <sup>13</sup> C NMR spectra for compounds <b>1, 7-29</b> | 2-25  |
| Calculated ADMET report from swissadme.ch for compound <b>18</b>                      | 26-27 |

$^1\text{H}$  and  $^{13}\text{C}$  NMR spectra of compound 1

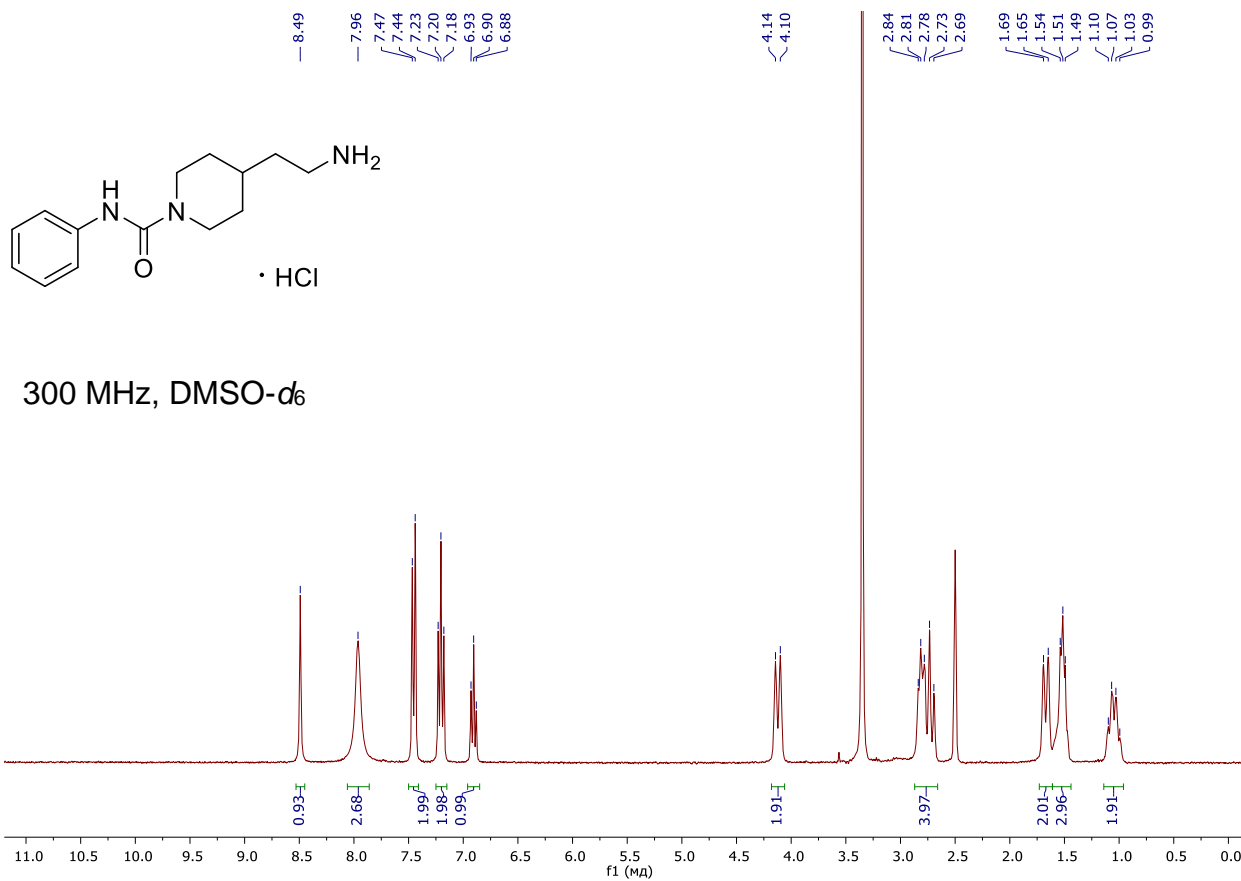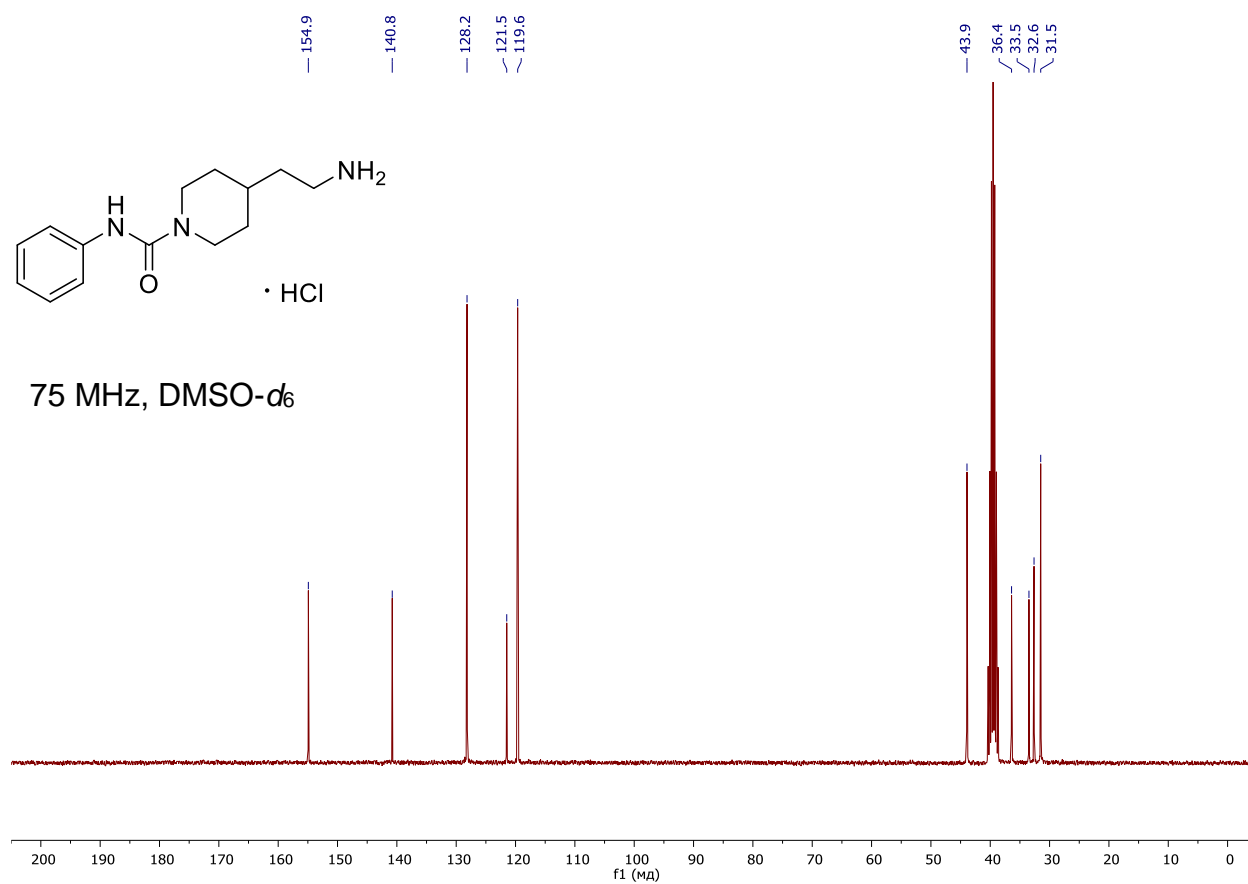

$^1\text{H}$  and  $^{13}\text{C}$  NMR spectra of compound 7

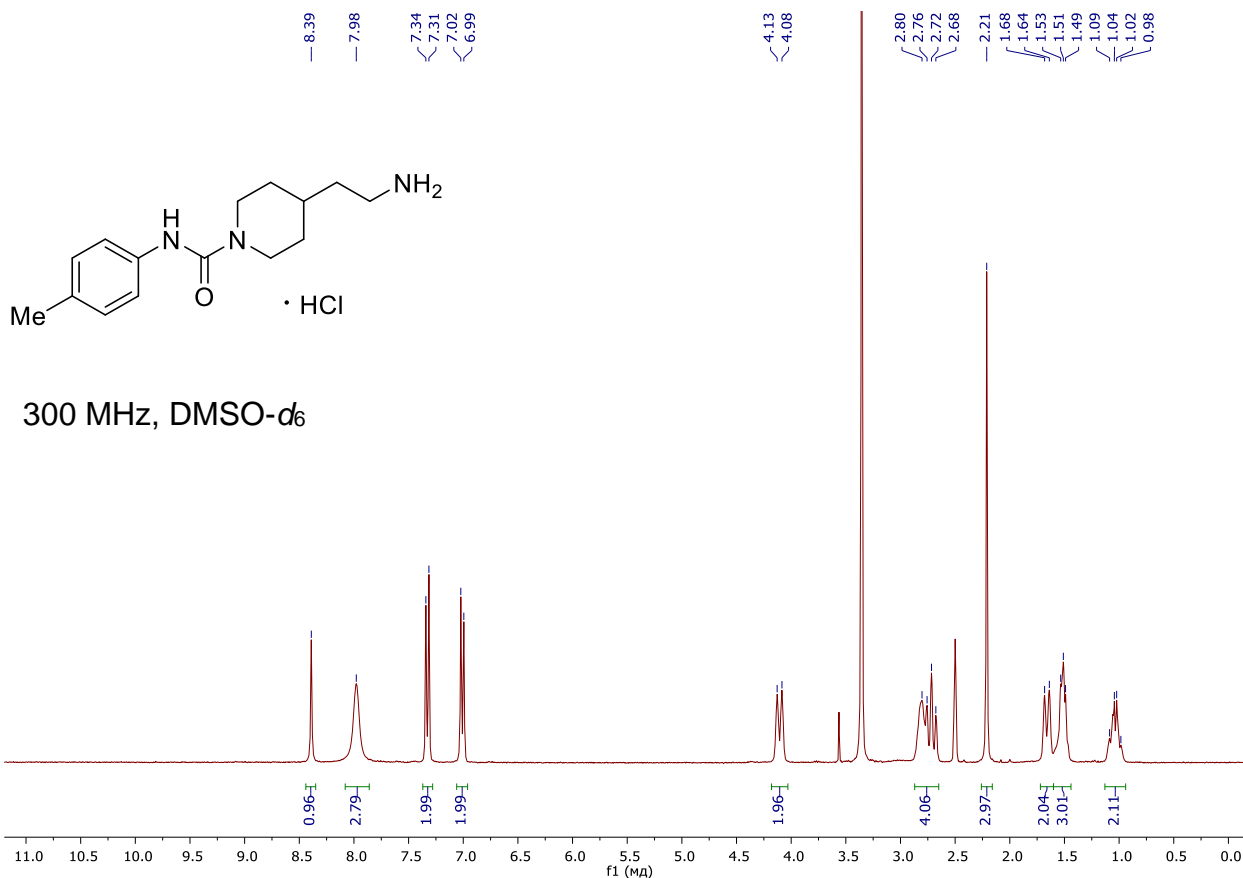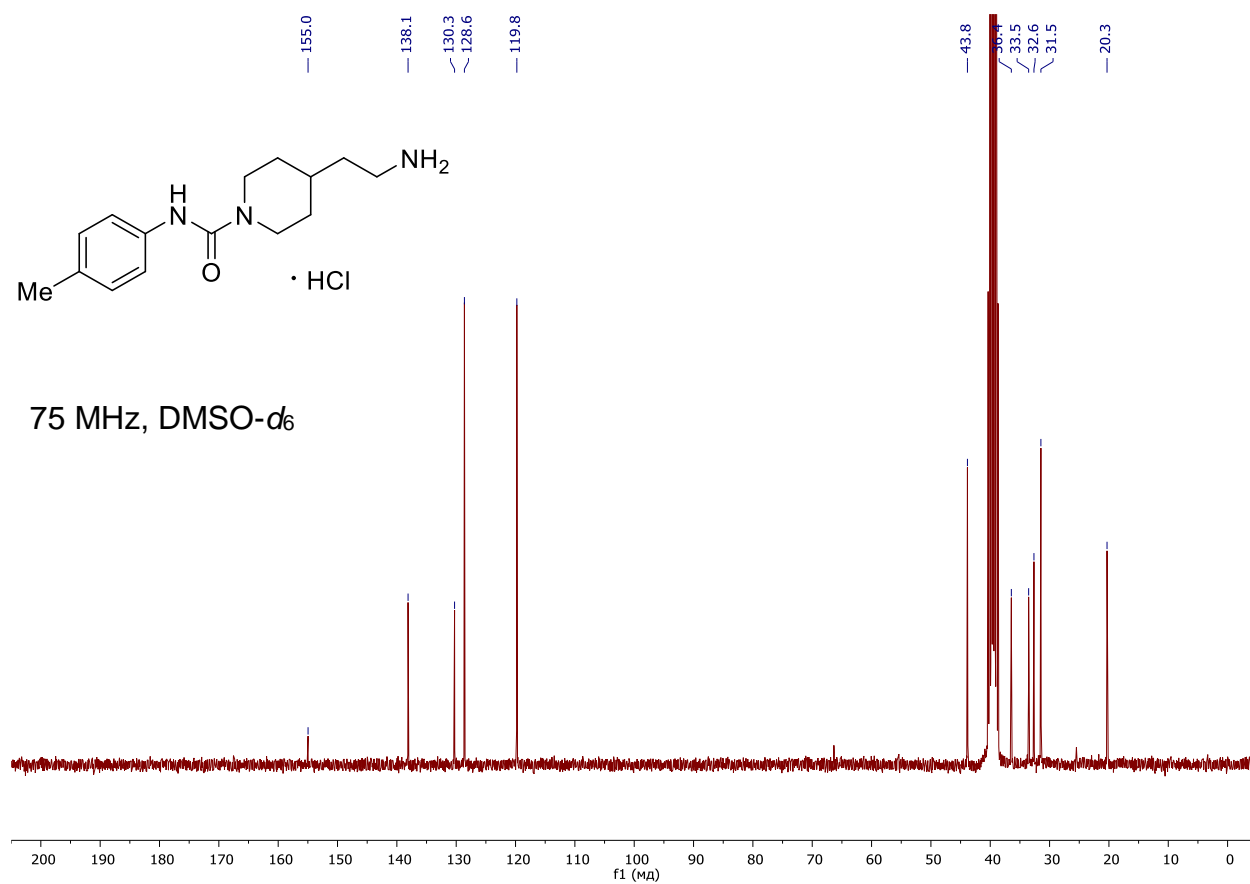

$^1\text{H}$  and  $^{13}\text{C}$  NMR spectra of compound **8**

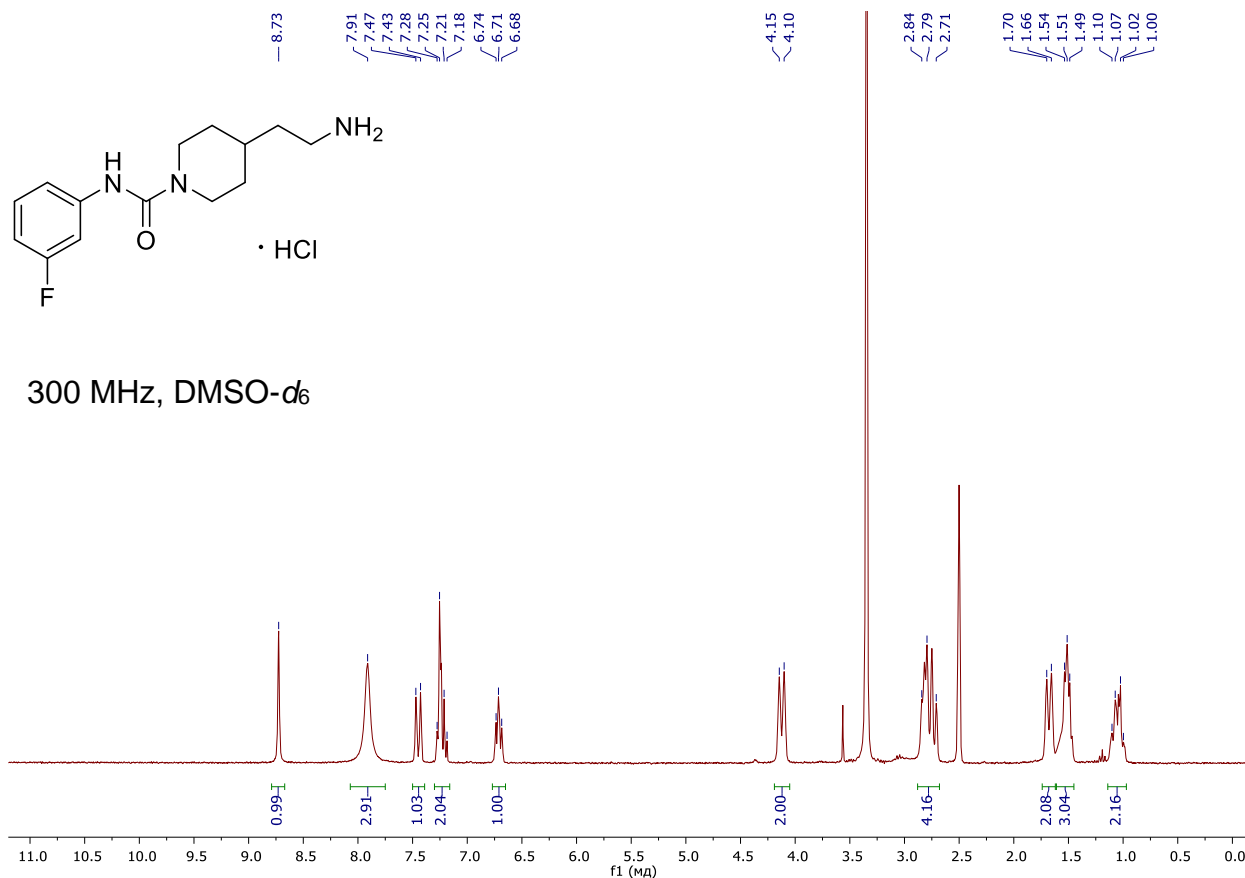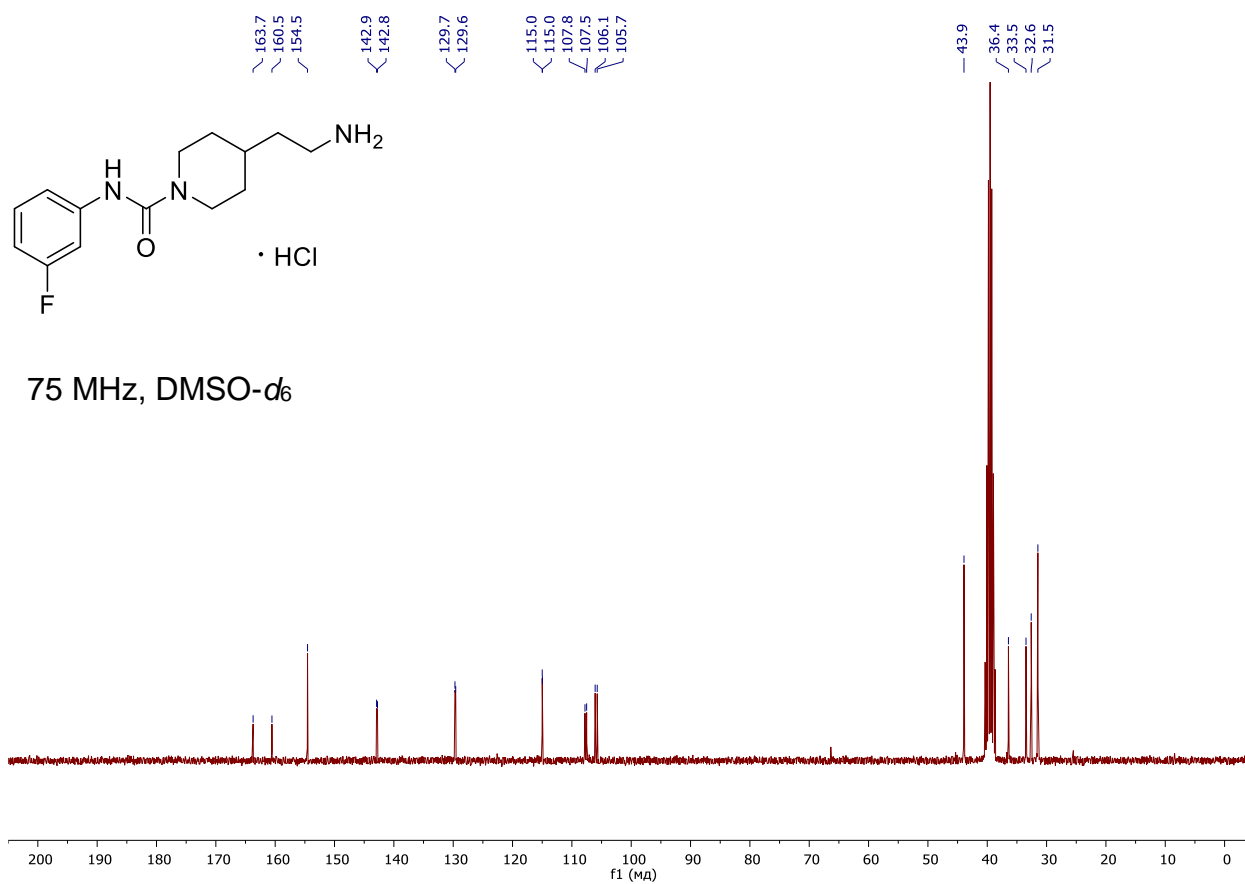

<sup>1</sup>H and <sup>13</sup>C NMR spectra of compound **9**

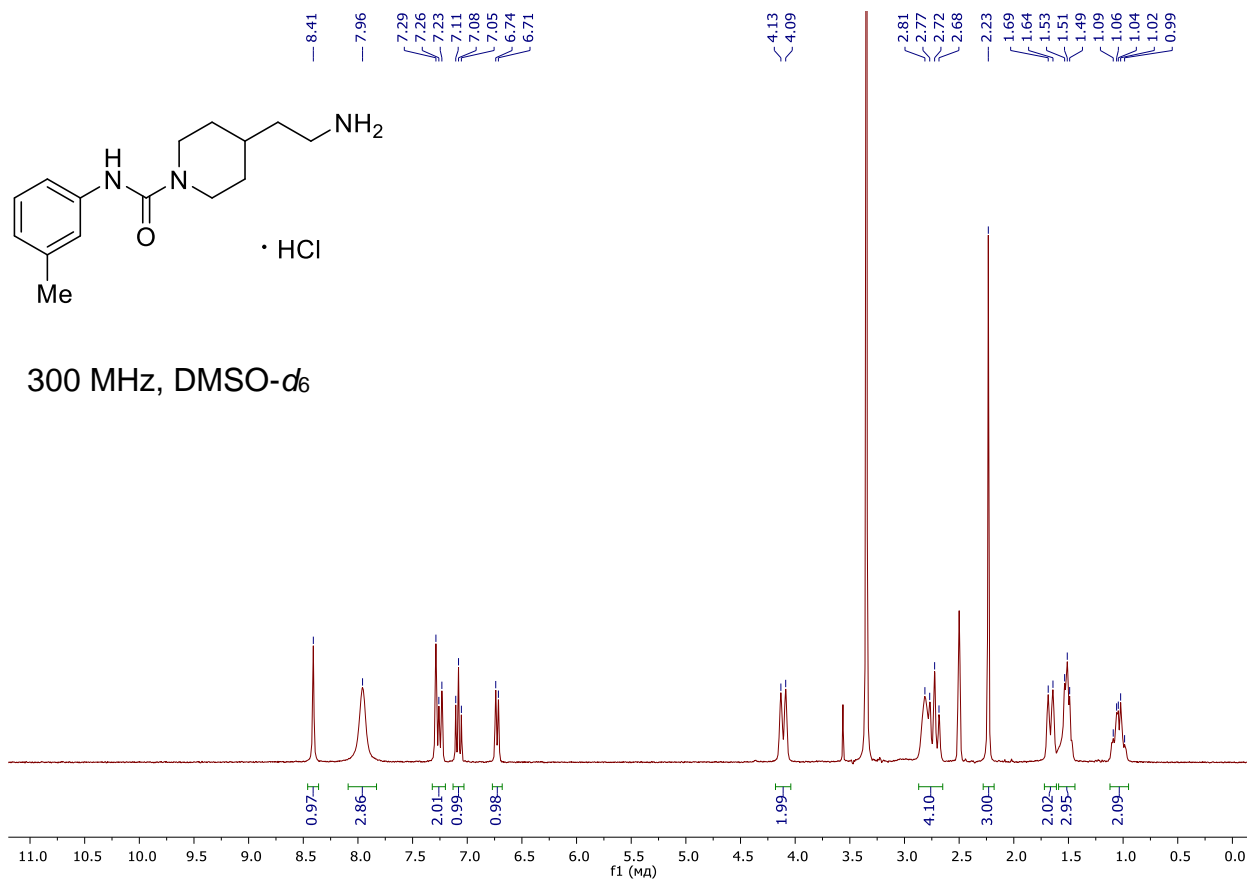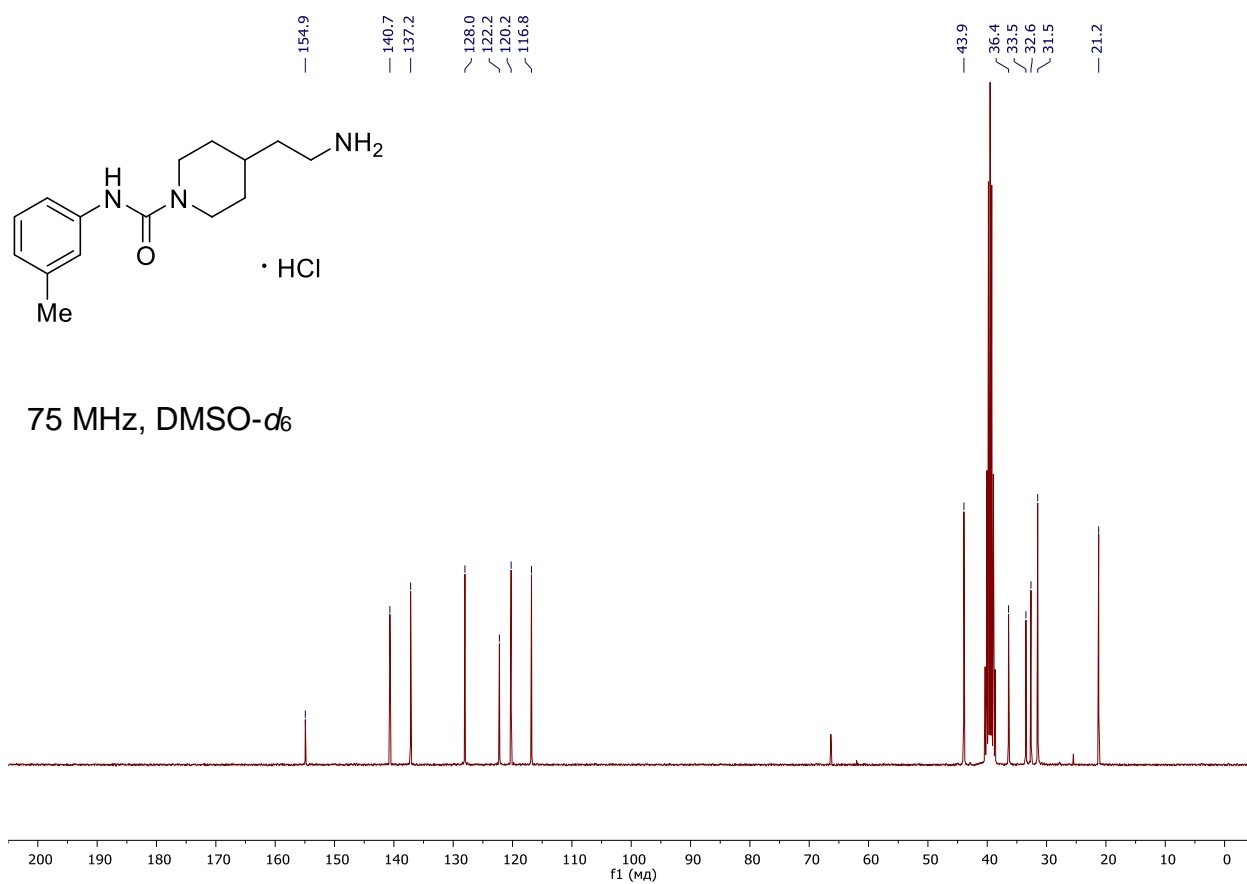

$^1\text{H}$  and  $^{13}\text{C}$  NMR spectra of compound **10**

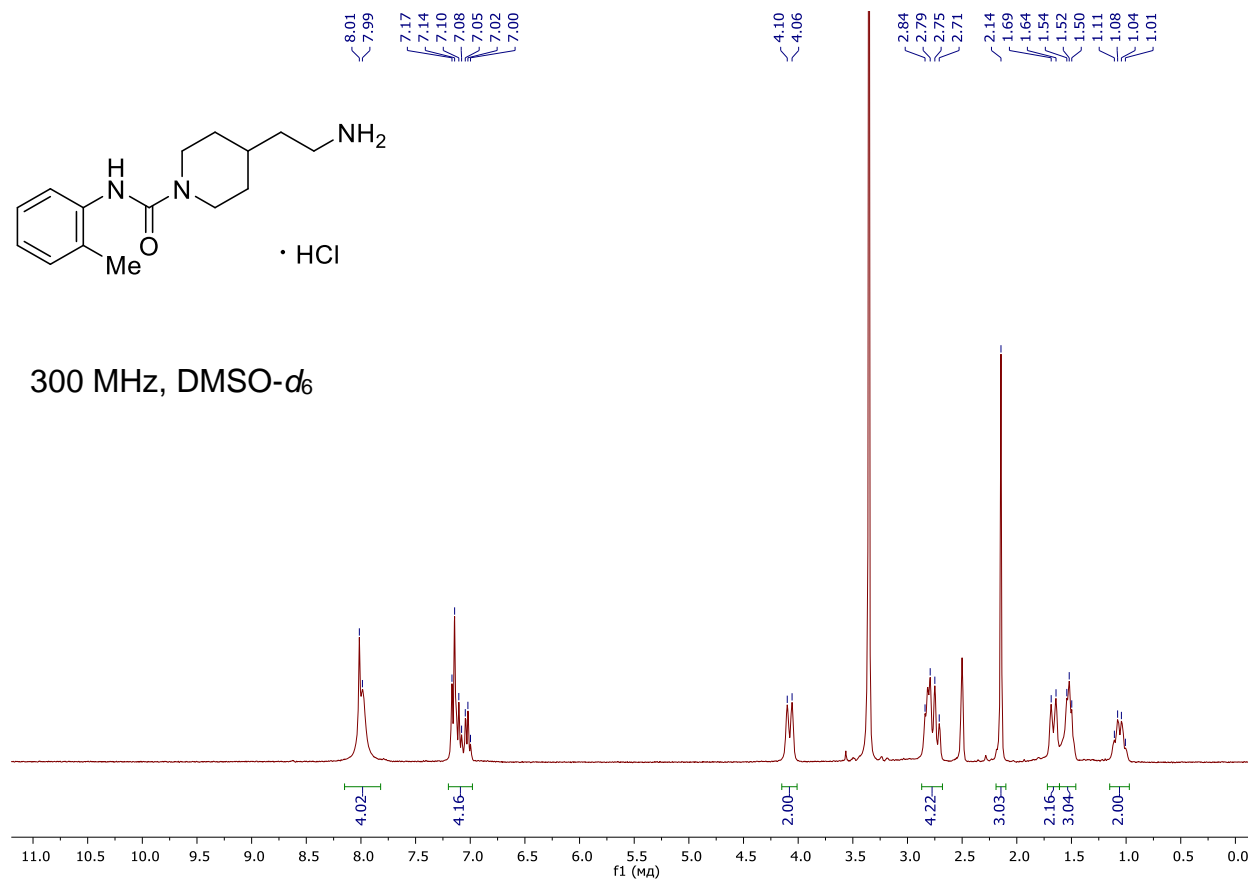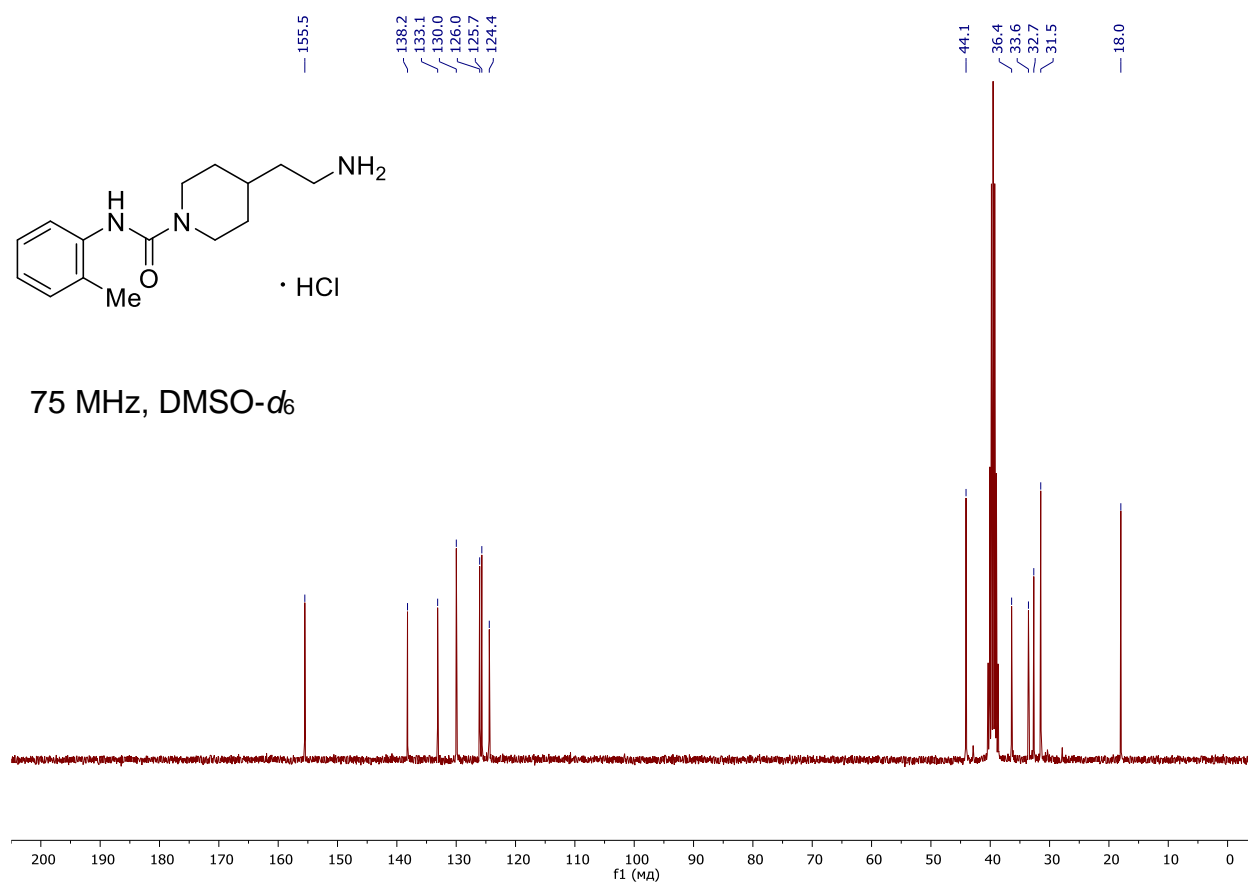

$^1\text{H}$  and  $^{13}\text{C}$  NMR spectra of compound **11**

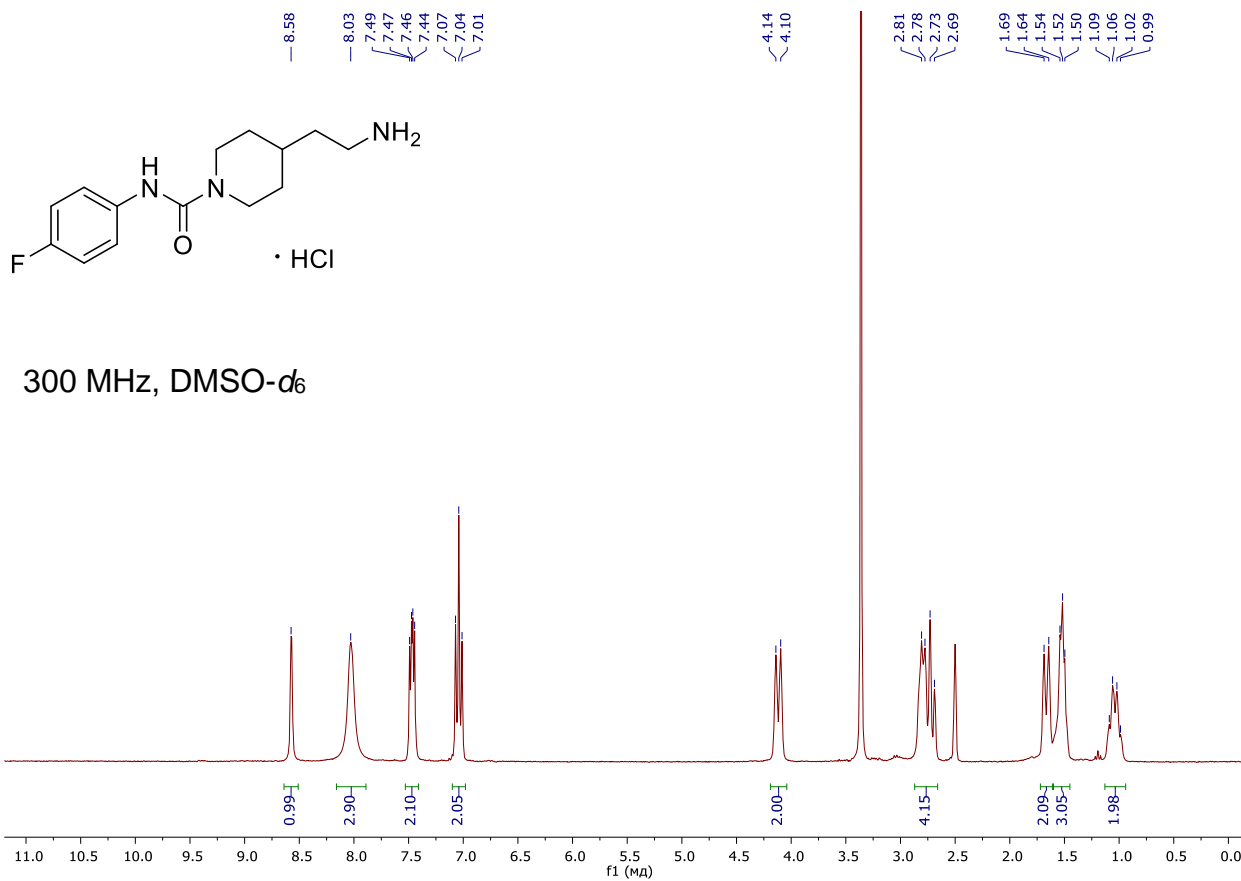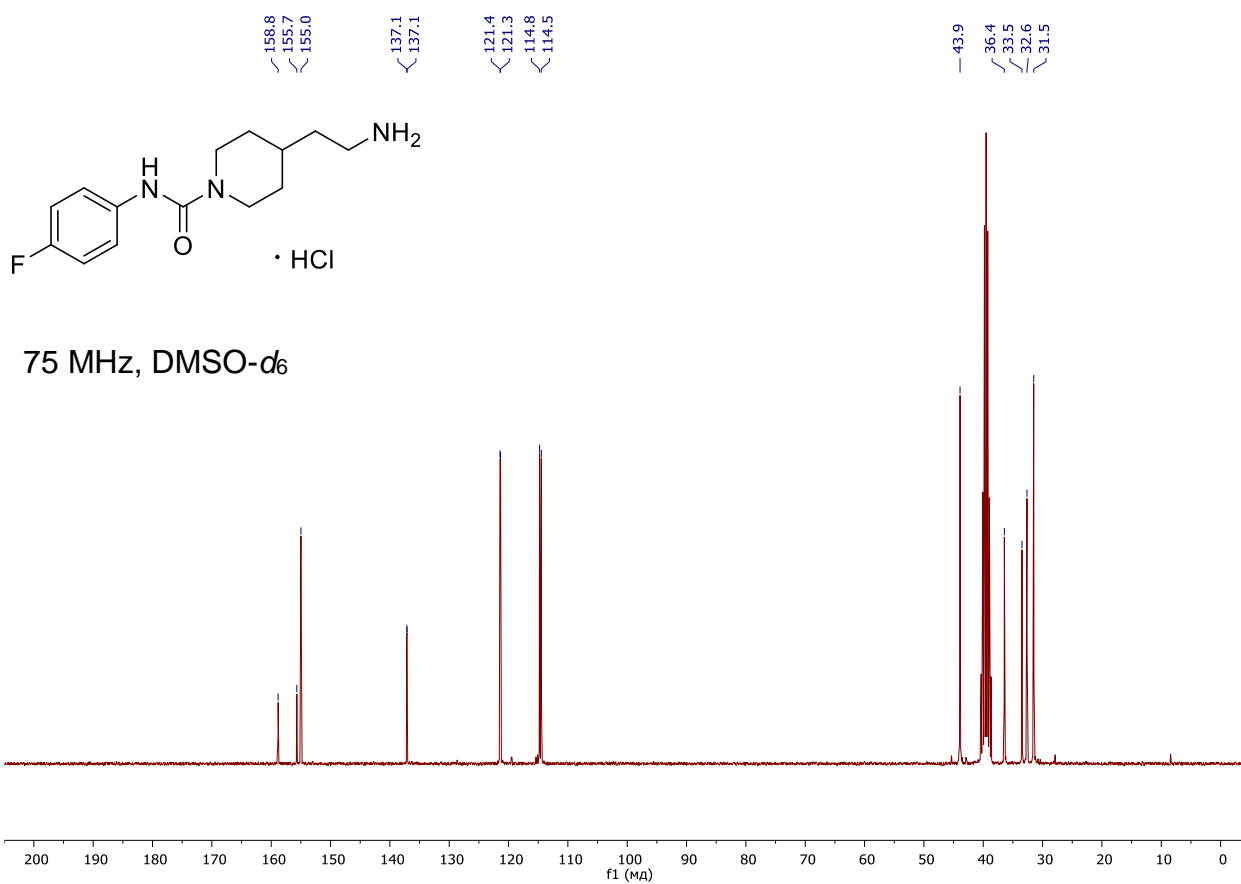

$^1\text{H}$  and  $^{13}\text{C}$  NMR spectra of compound **12**

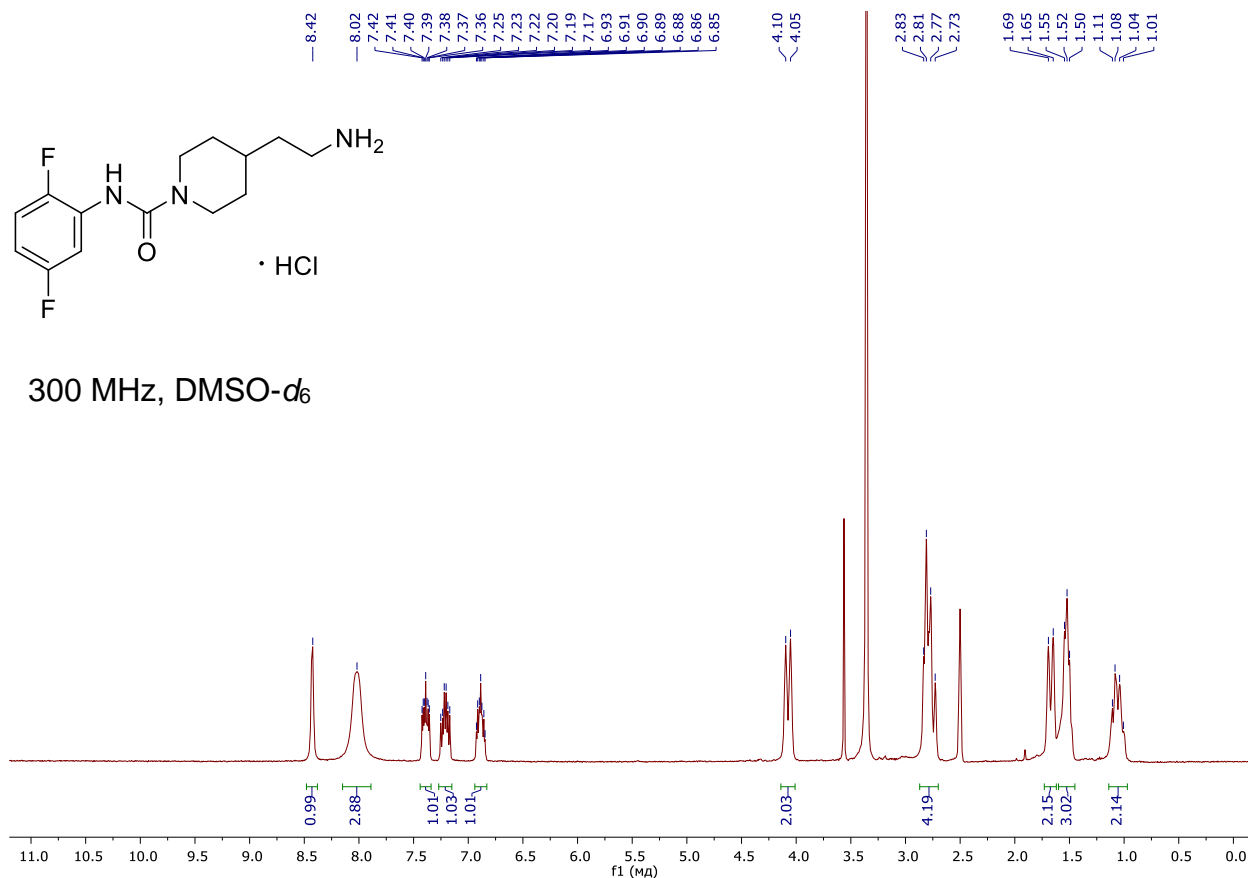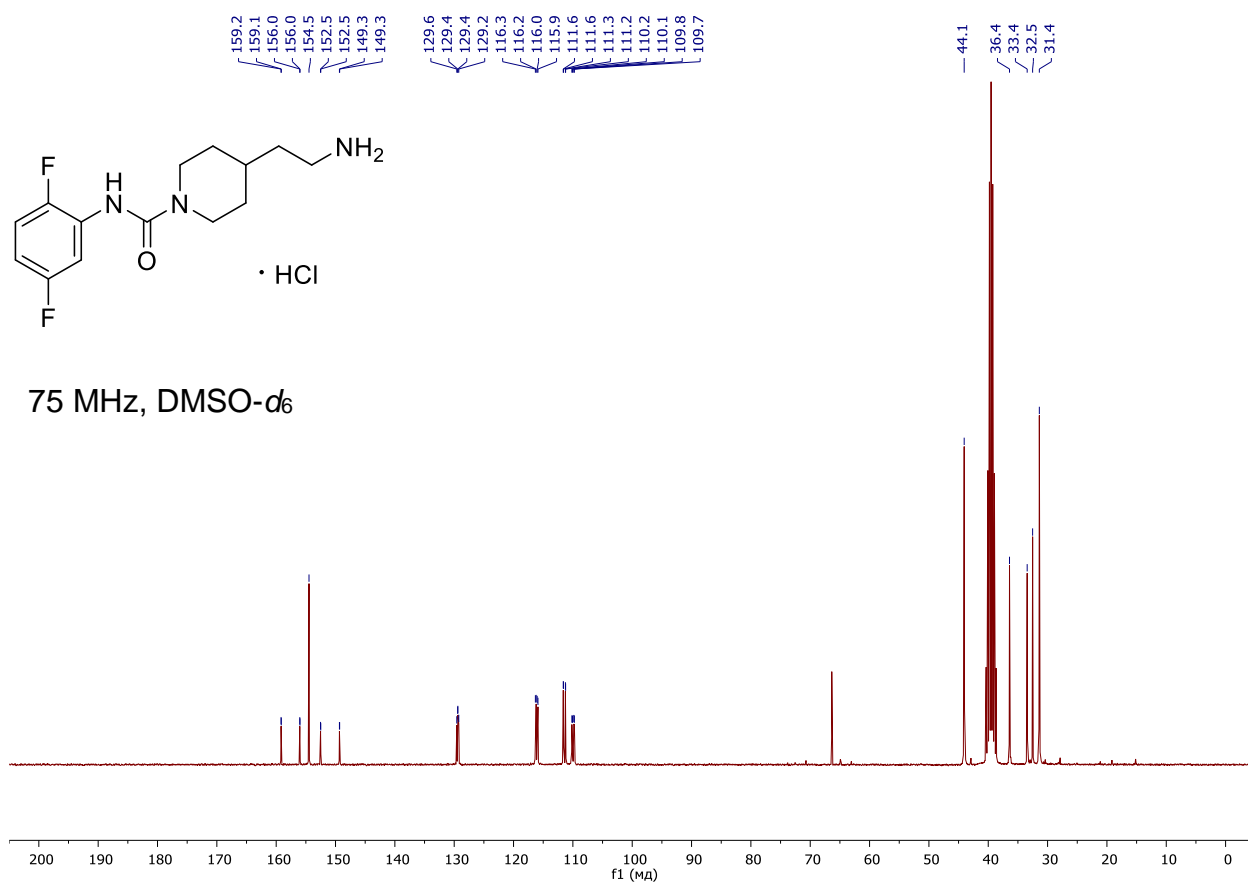



$^1\text{H}$  and  $^{13}\text{C}$  NMR spectra of compound **13**

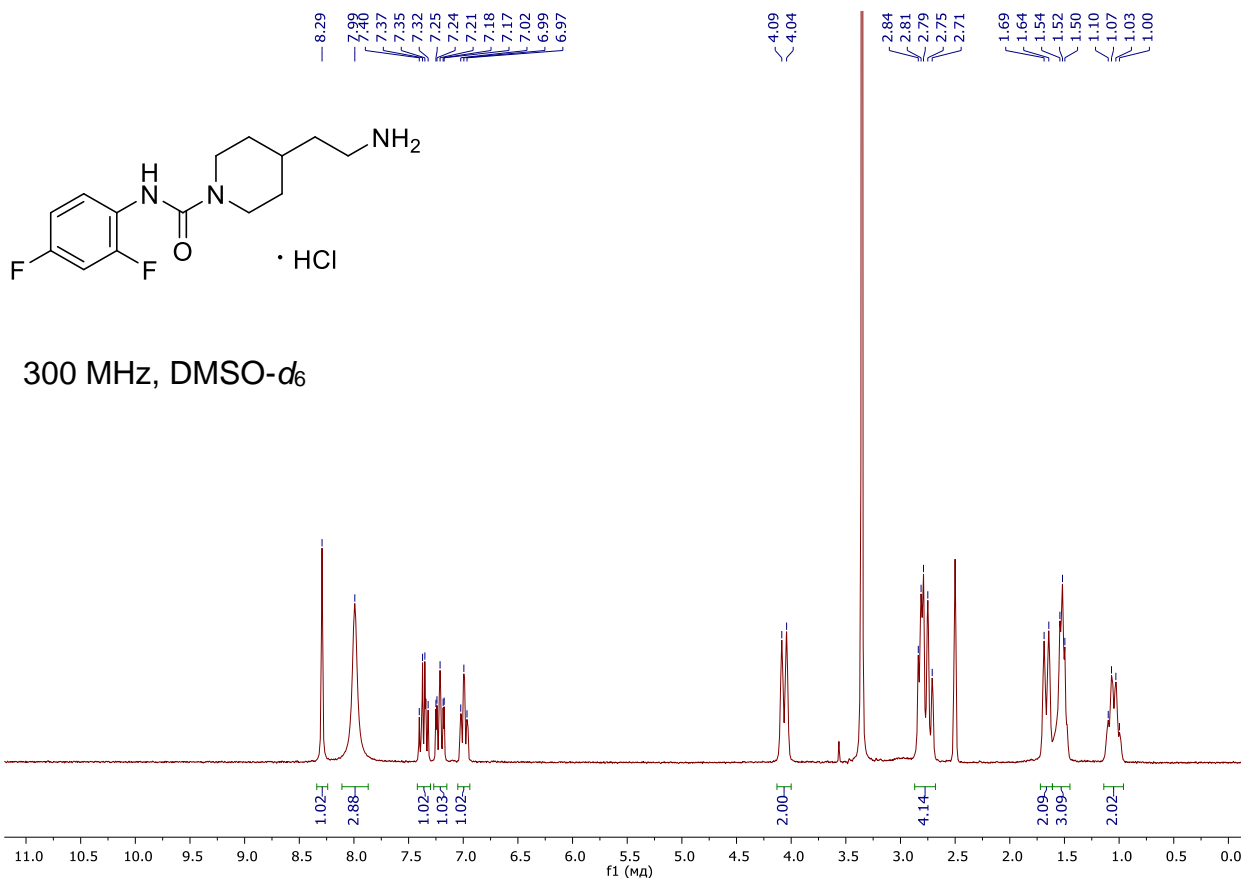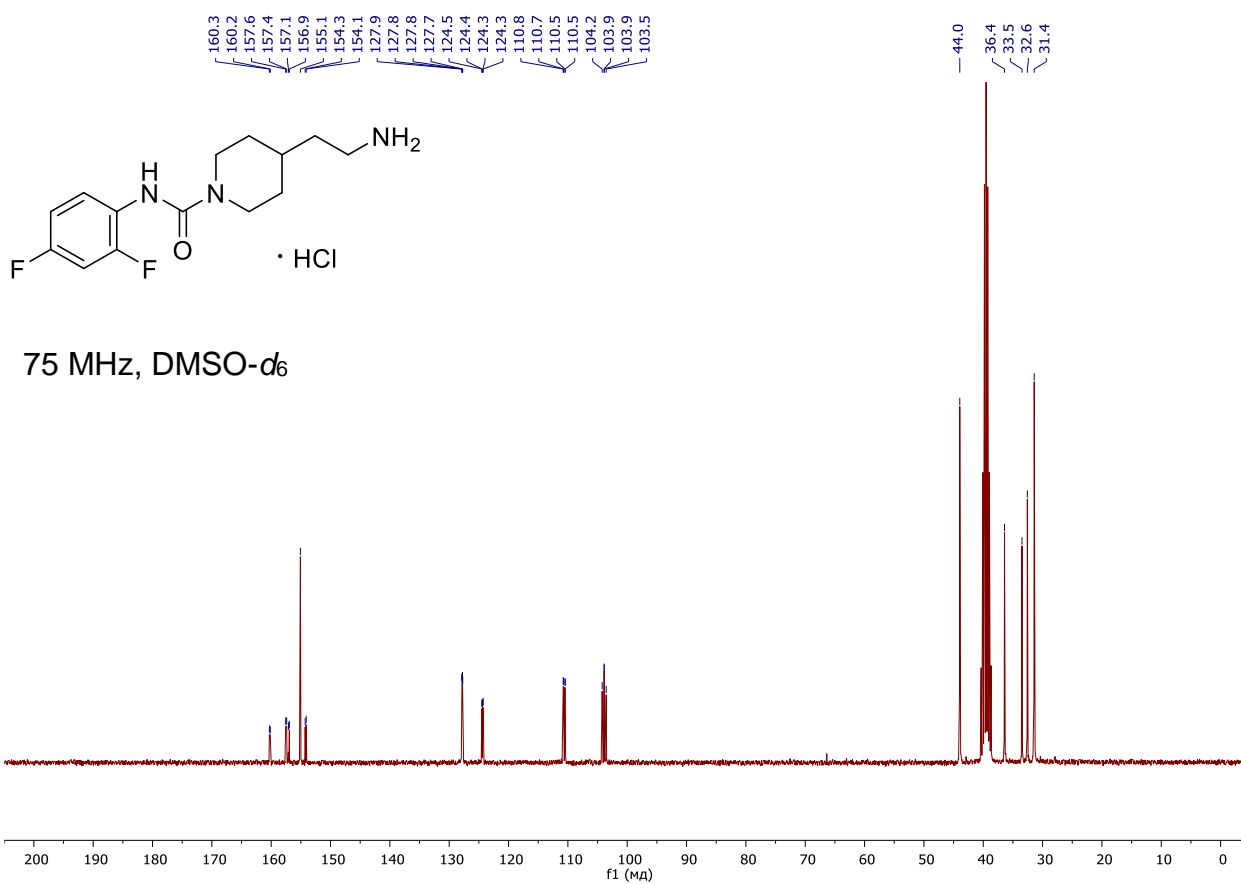

$^1\text{H}$  and  $^{13}\text{C}$  NMR spectra of compound **14**

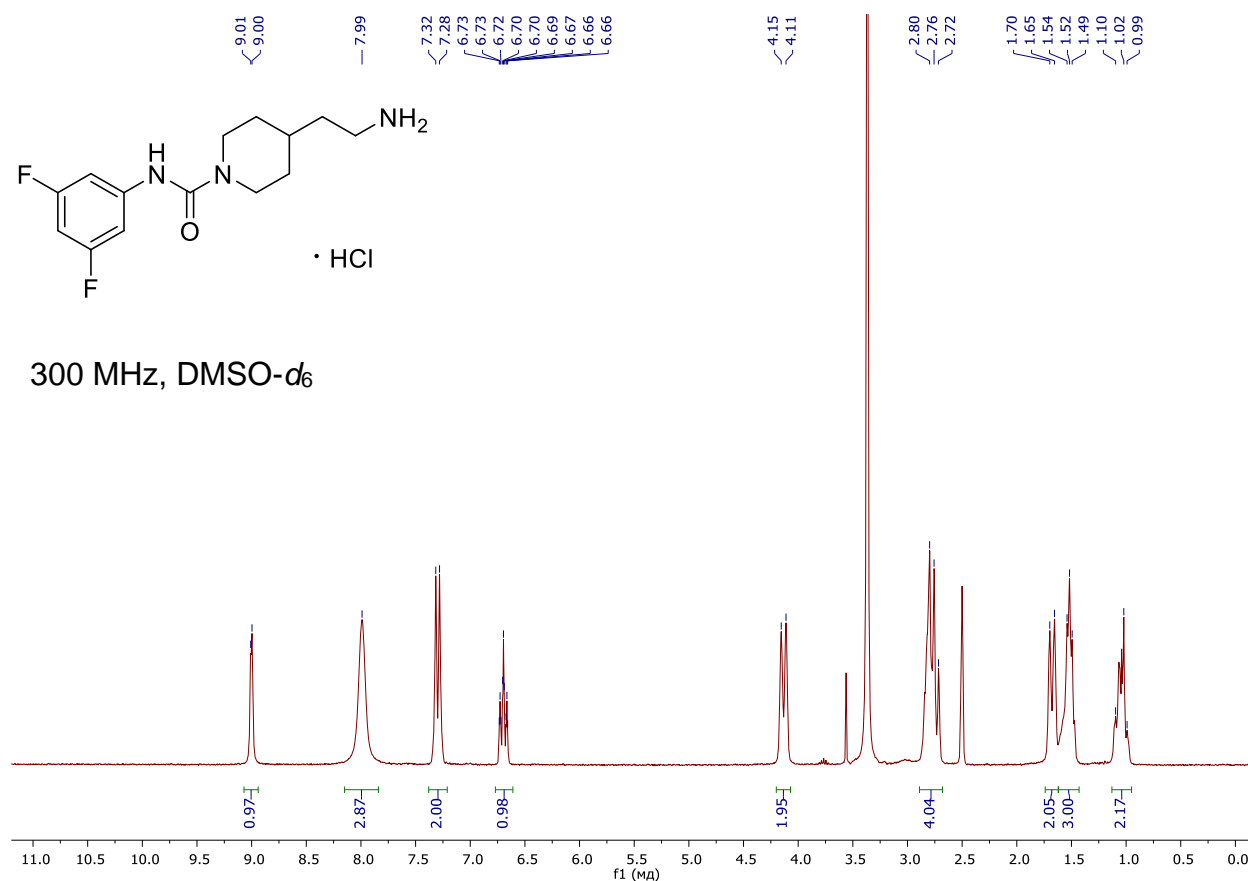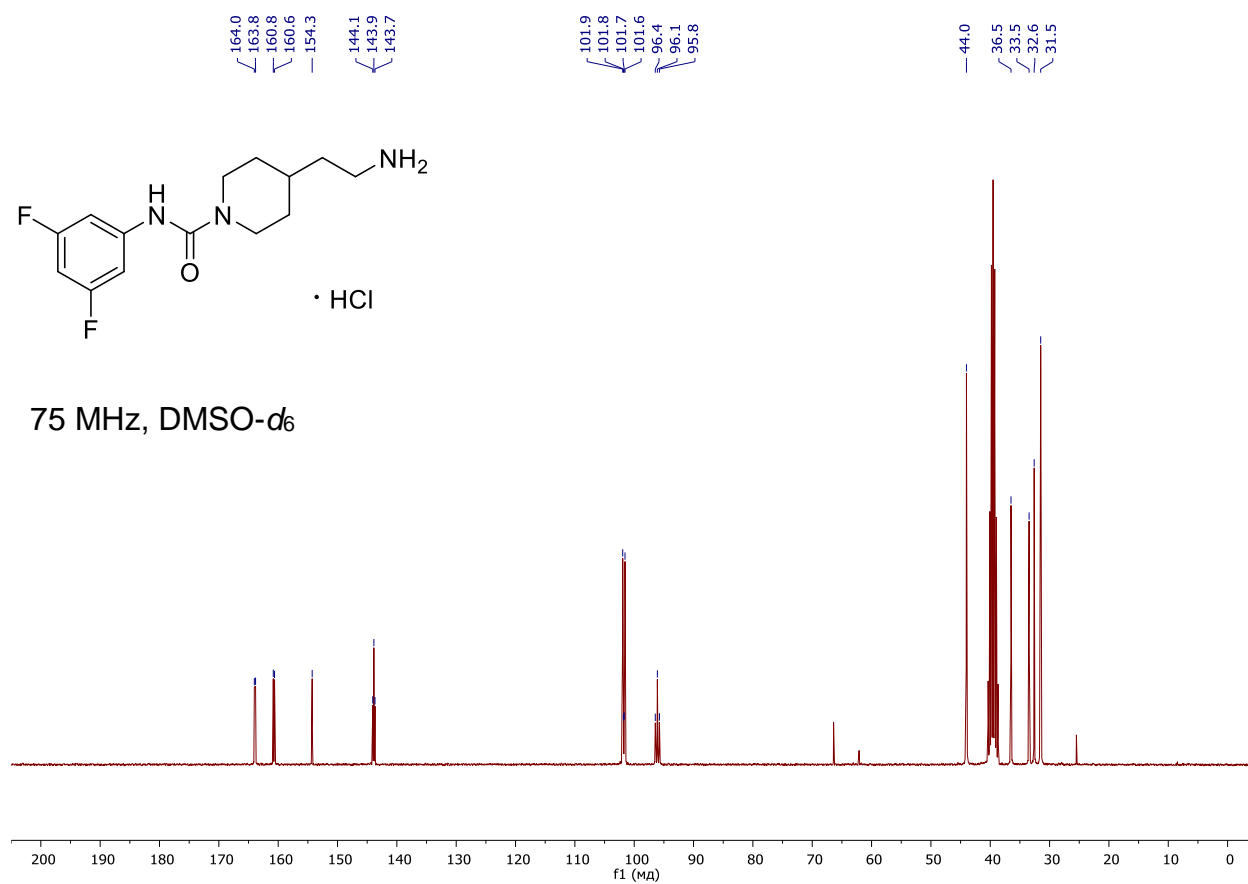

$^1\text{H}$  and  $^{13}\text{C}$  NMR spectra of compound **15**

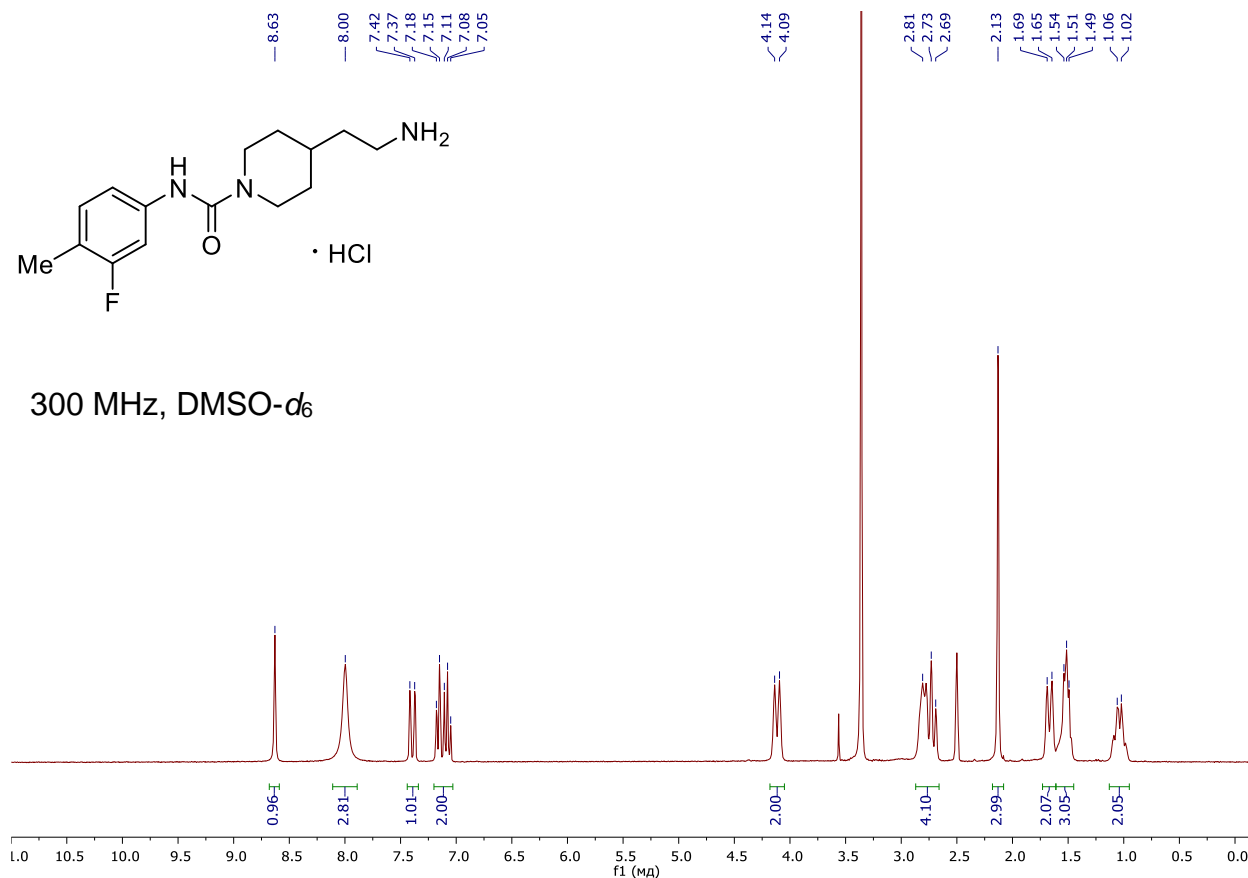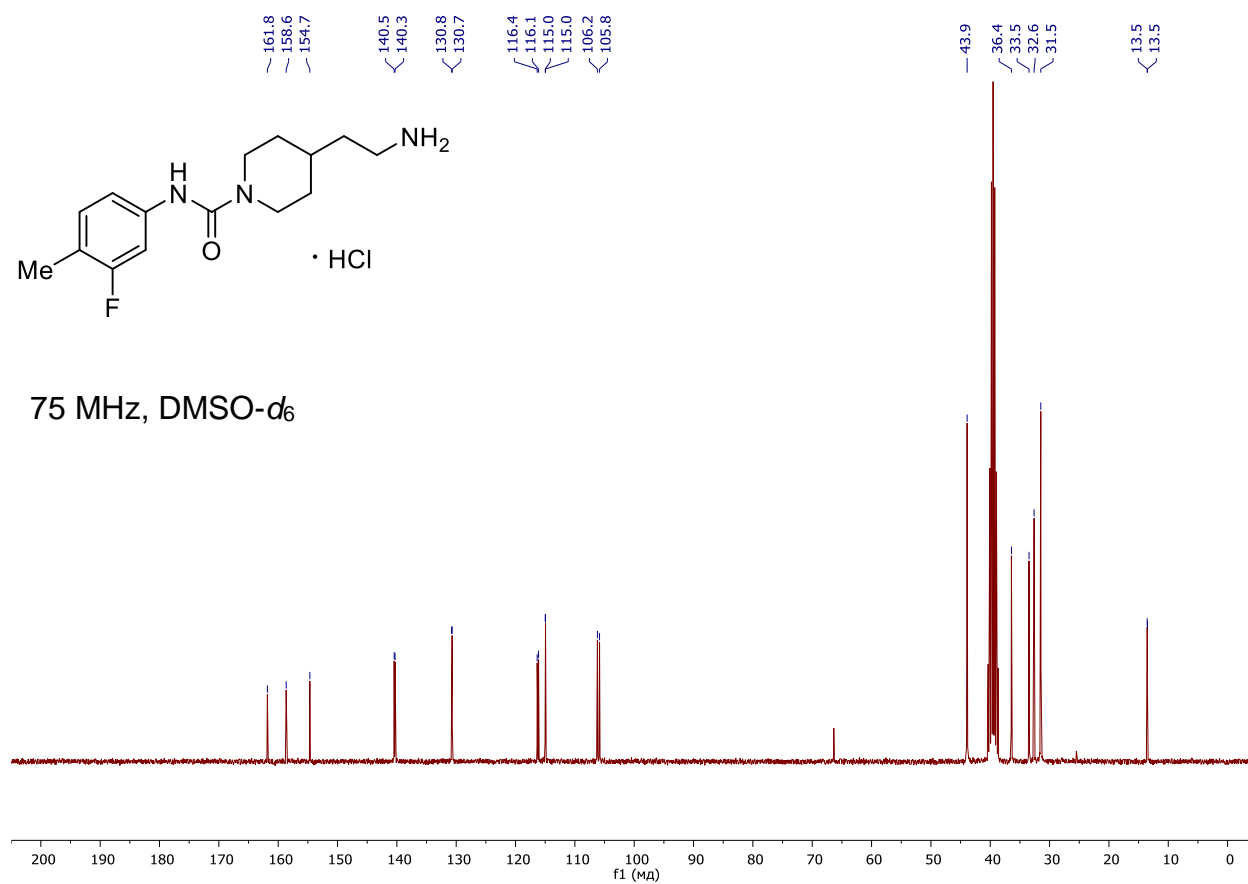

$^1\text{H}$  and  $^{13}\text{C}$  NMR spectra of compound **16**

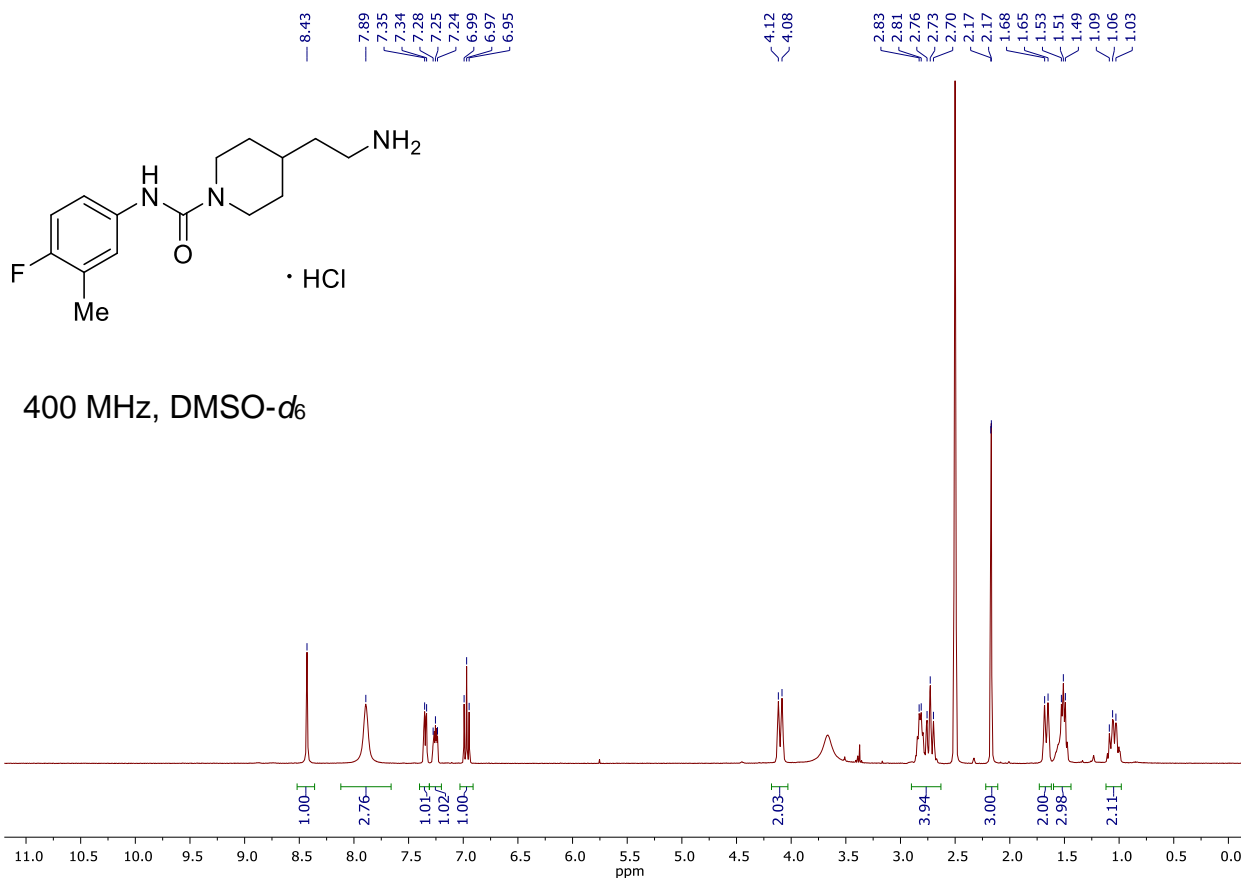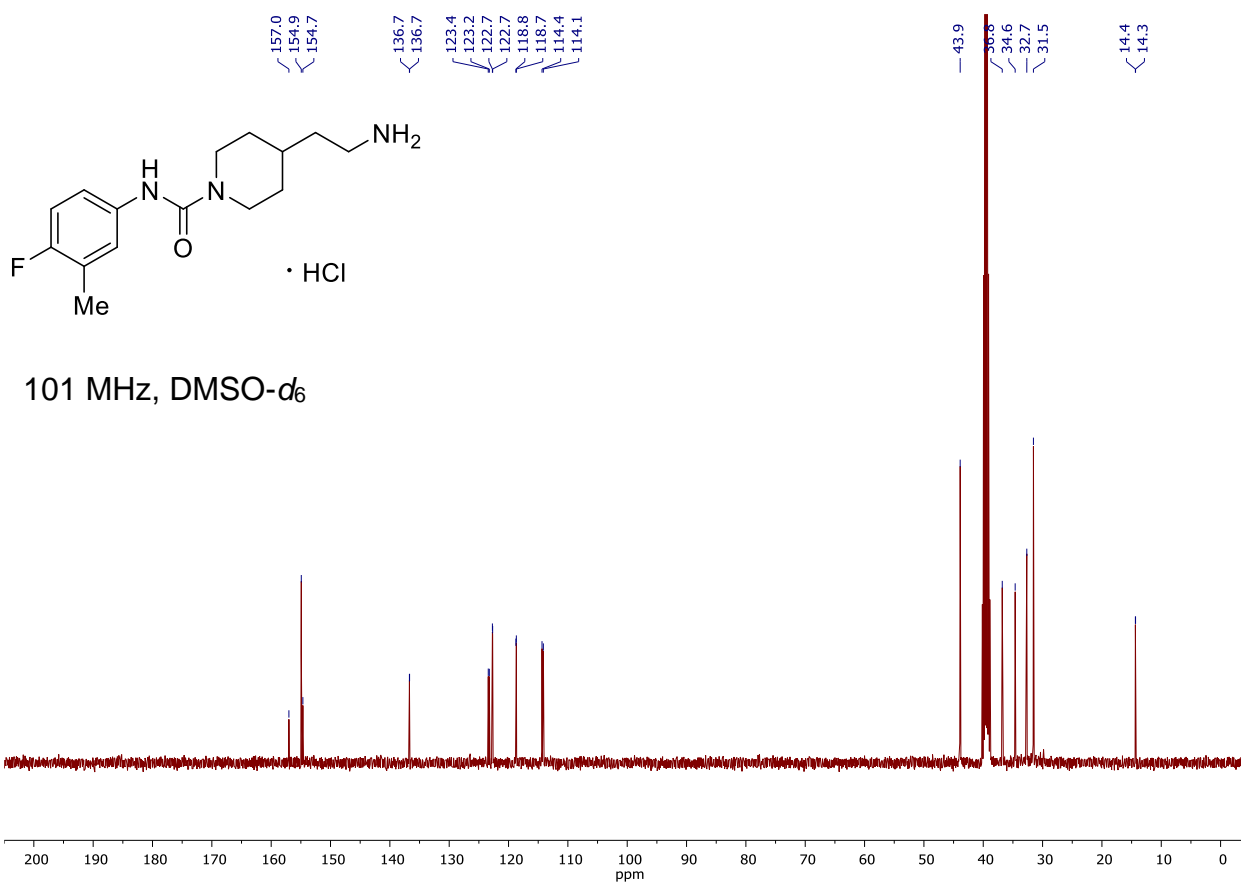

$^1\text{H}$  and  $^{13}\text{C}$  NMR spectra of compound **17**

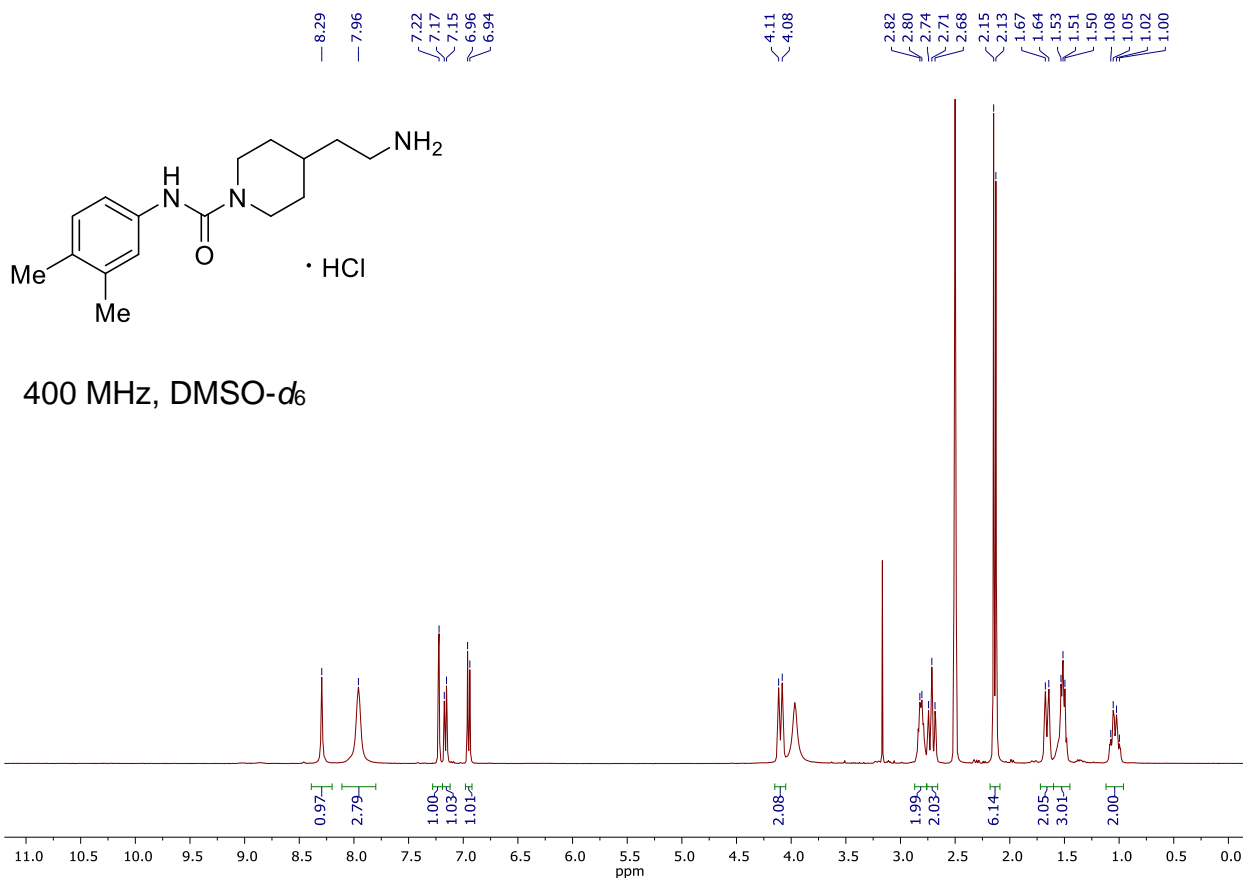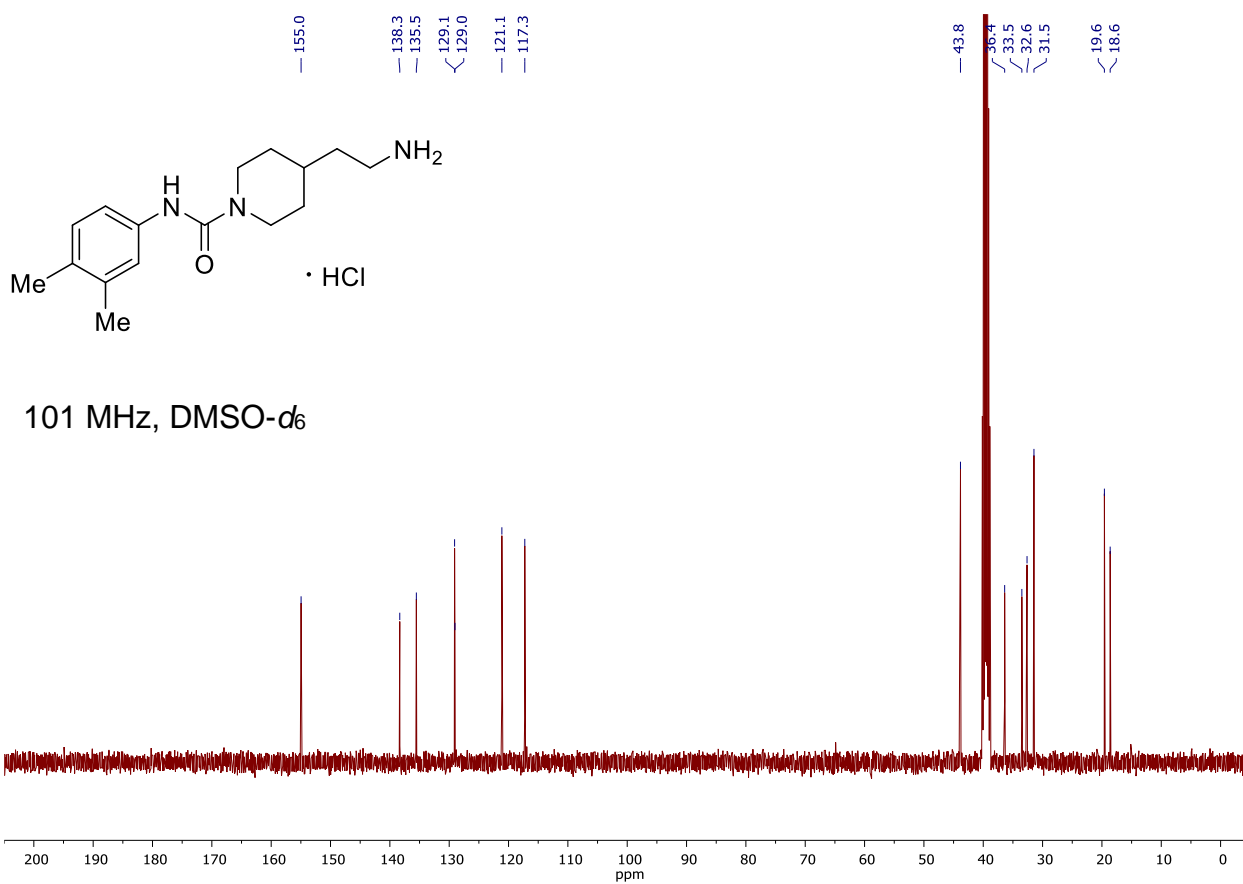

$^1\text{H}$  and  $^{13}\text{C}$  NMR spectra of compound **18** (AP163)

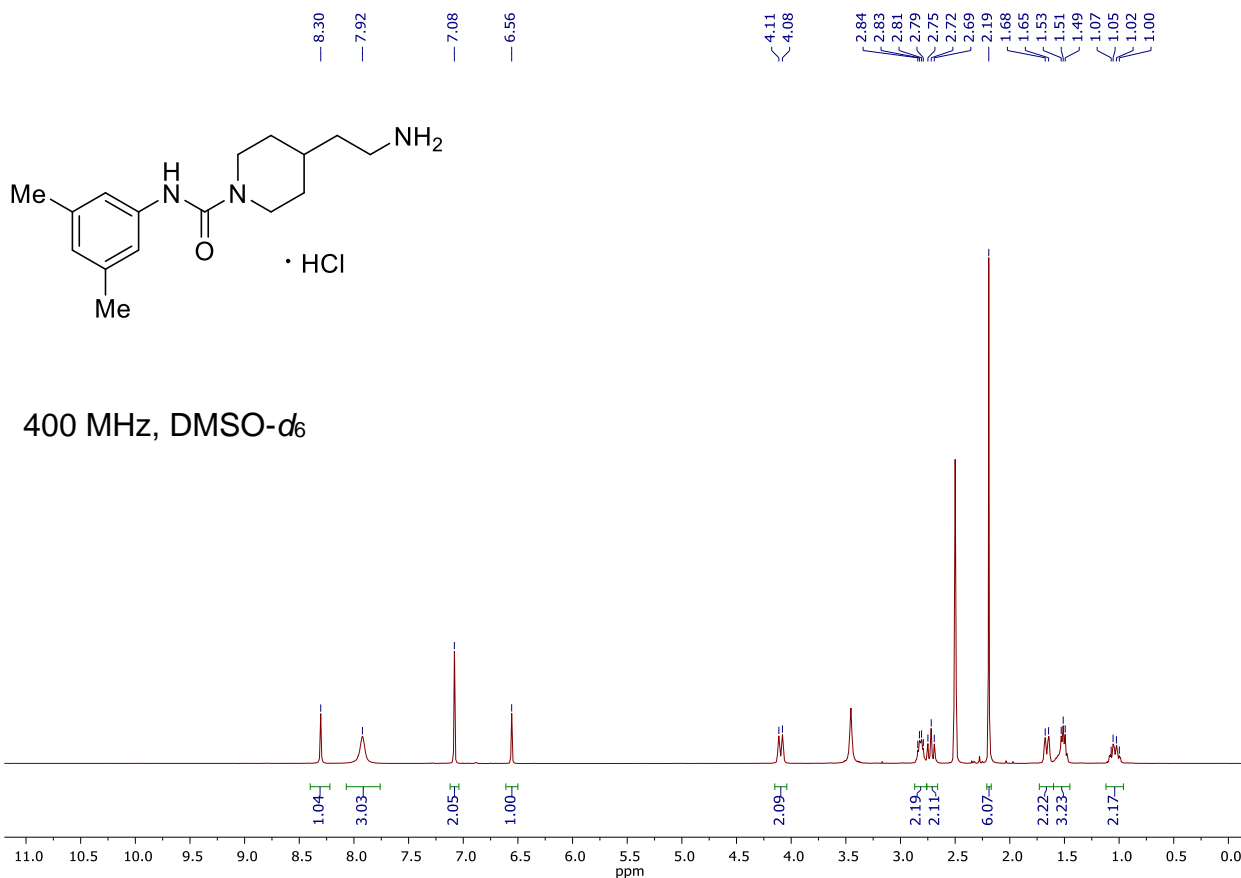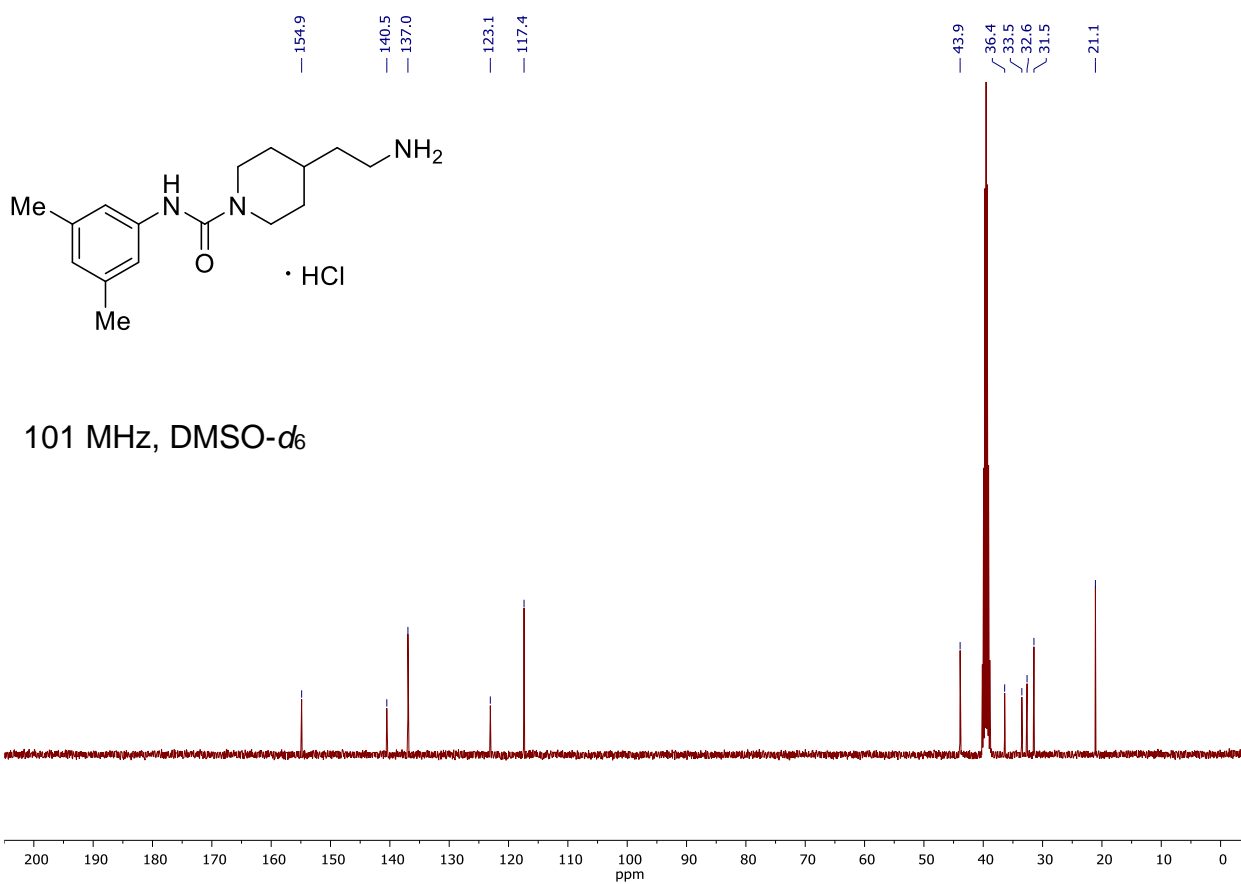

$^1\text{H}$  and  $^{13}\text{C}$  NMR spectra of compound **19**

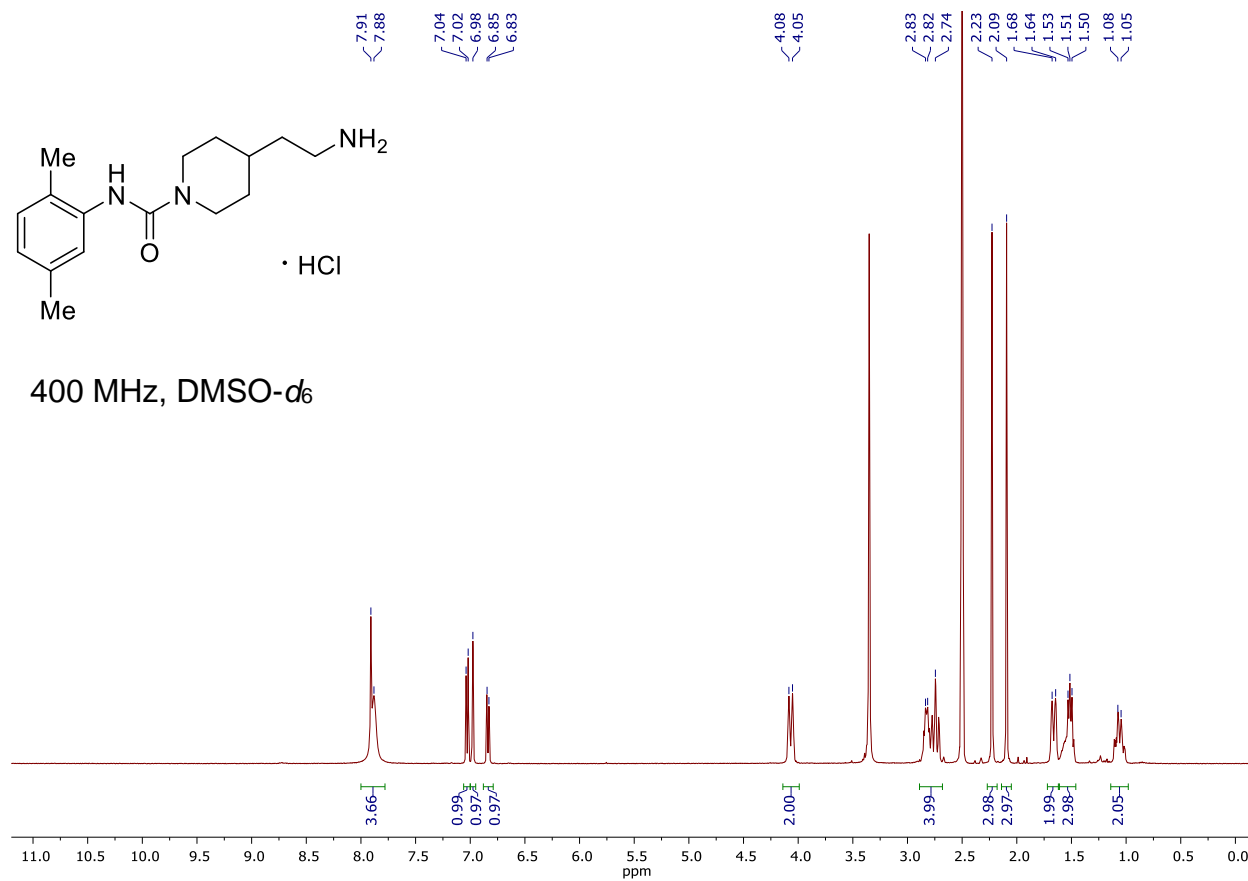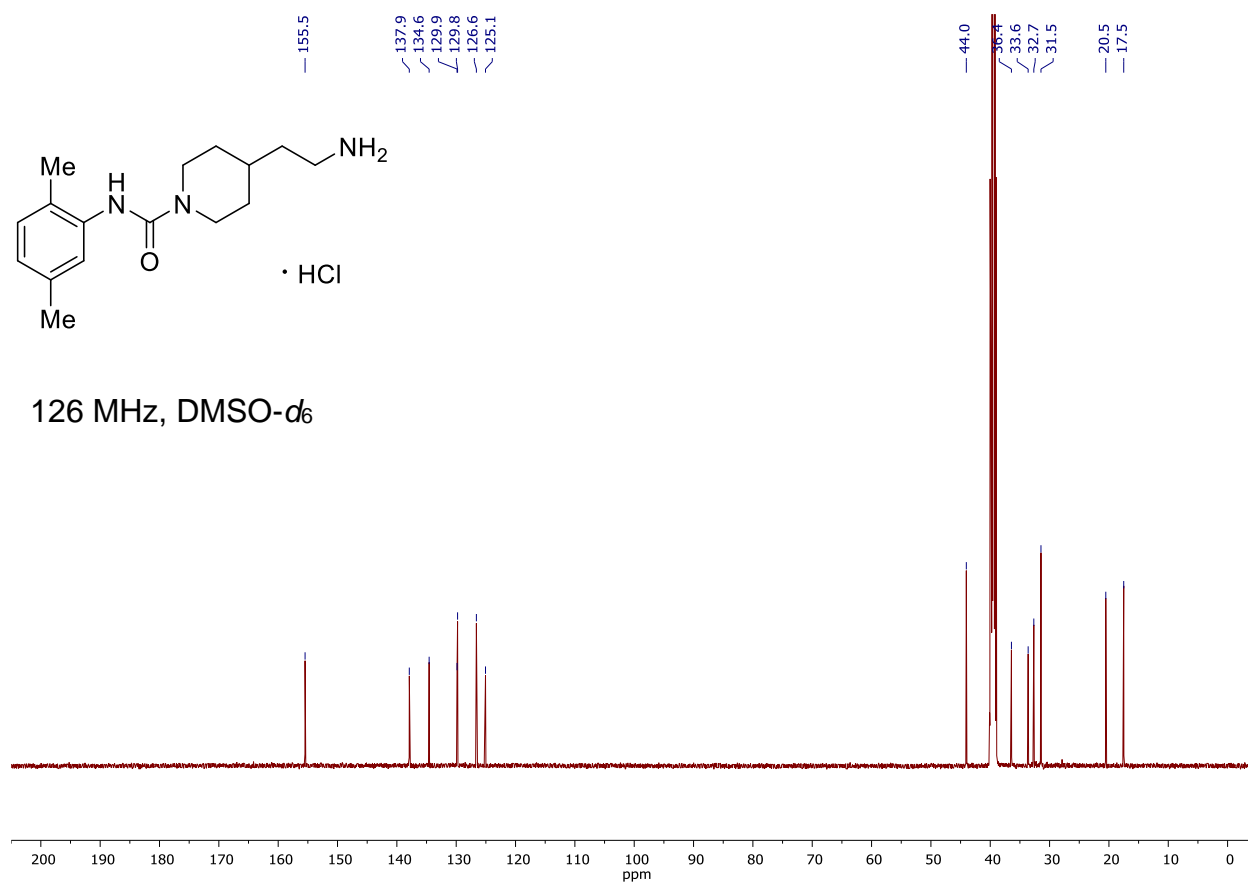

$^1\text{H}$  and  $^{13}\text{C}$  NMR spectra of compound **20**

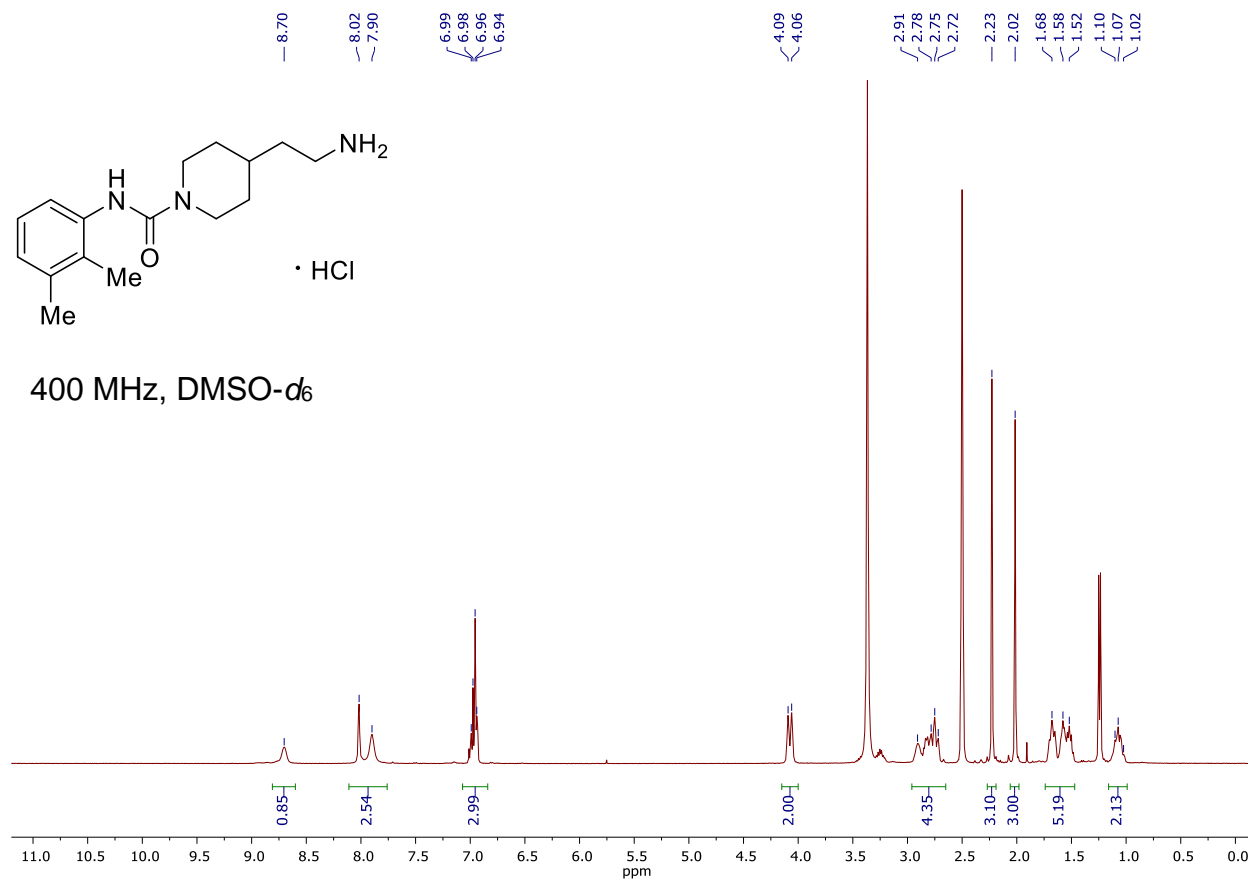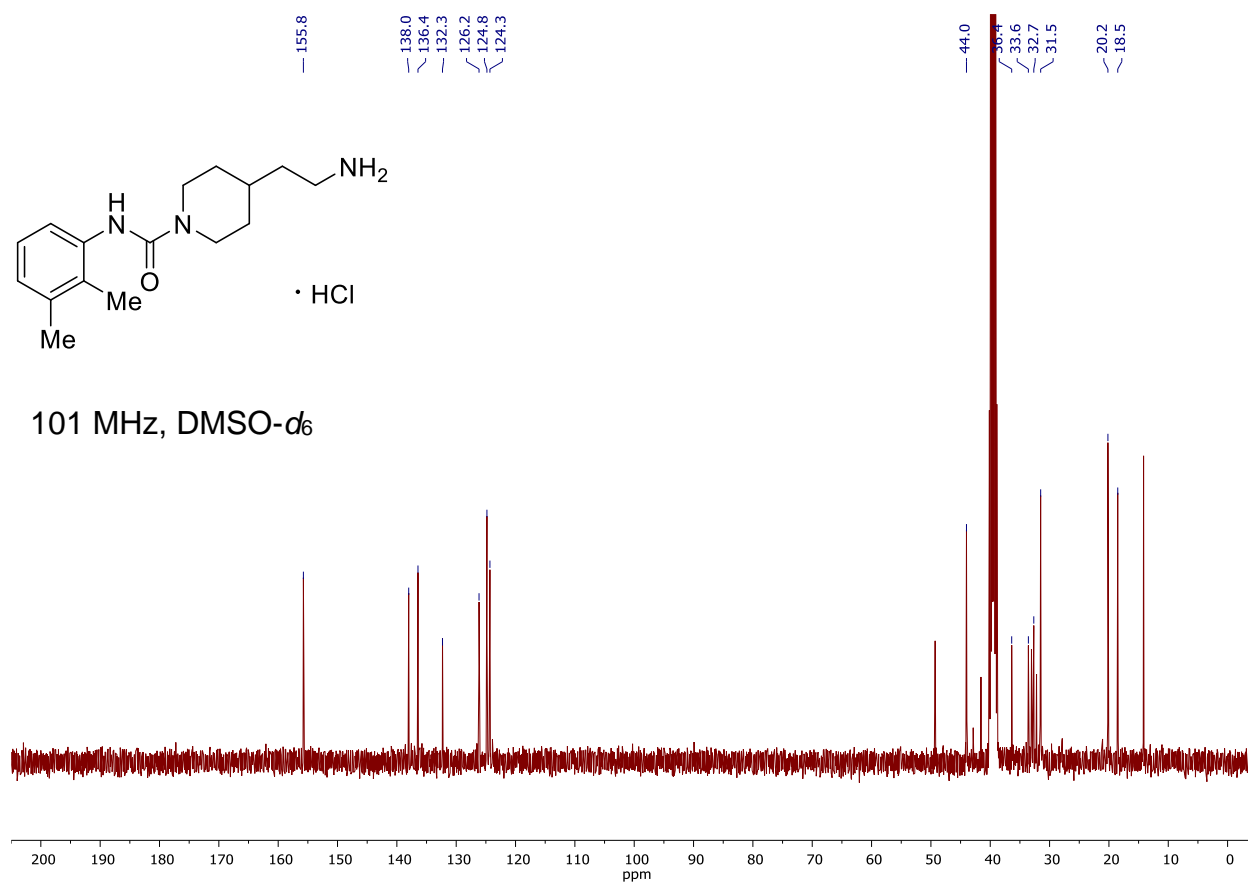



$^1\text{H}$  and  $^{13}\text{C}$  NMR spectra of compound **21**

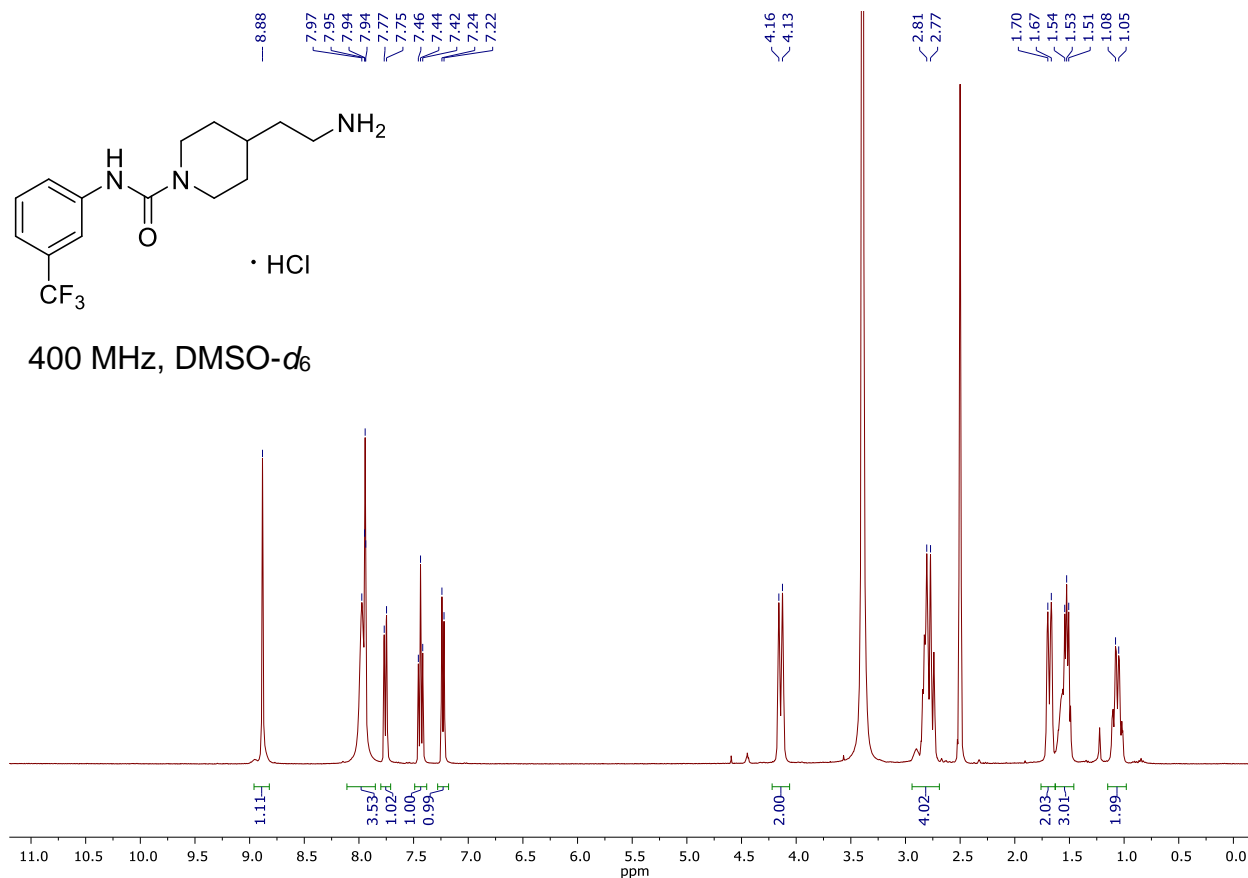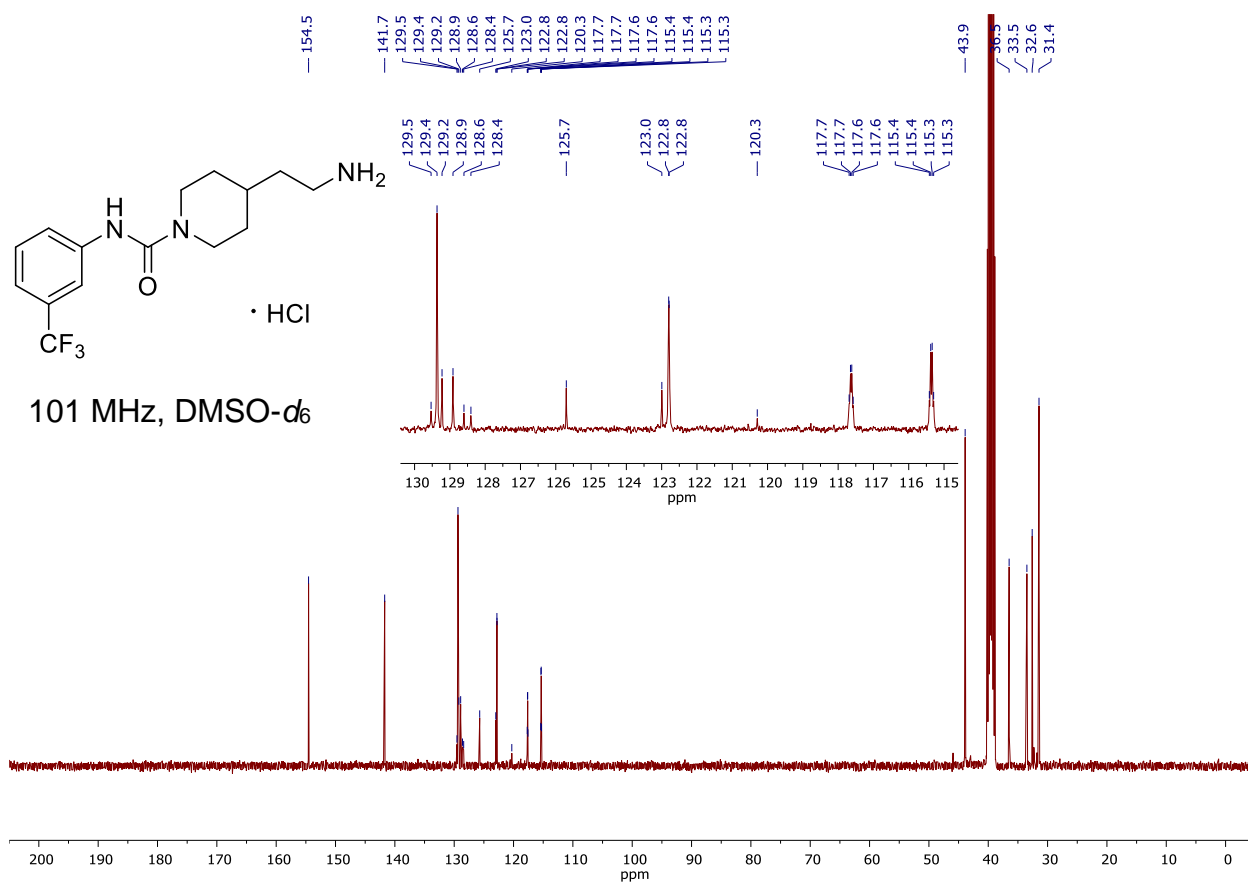

$^1\text{H}$  and  $^{13}\text{C}$  NMR spectra of compound **22**

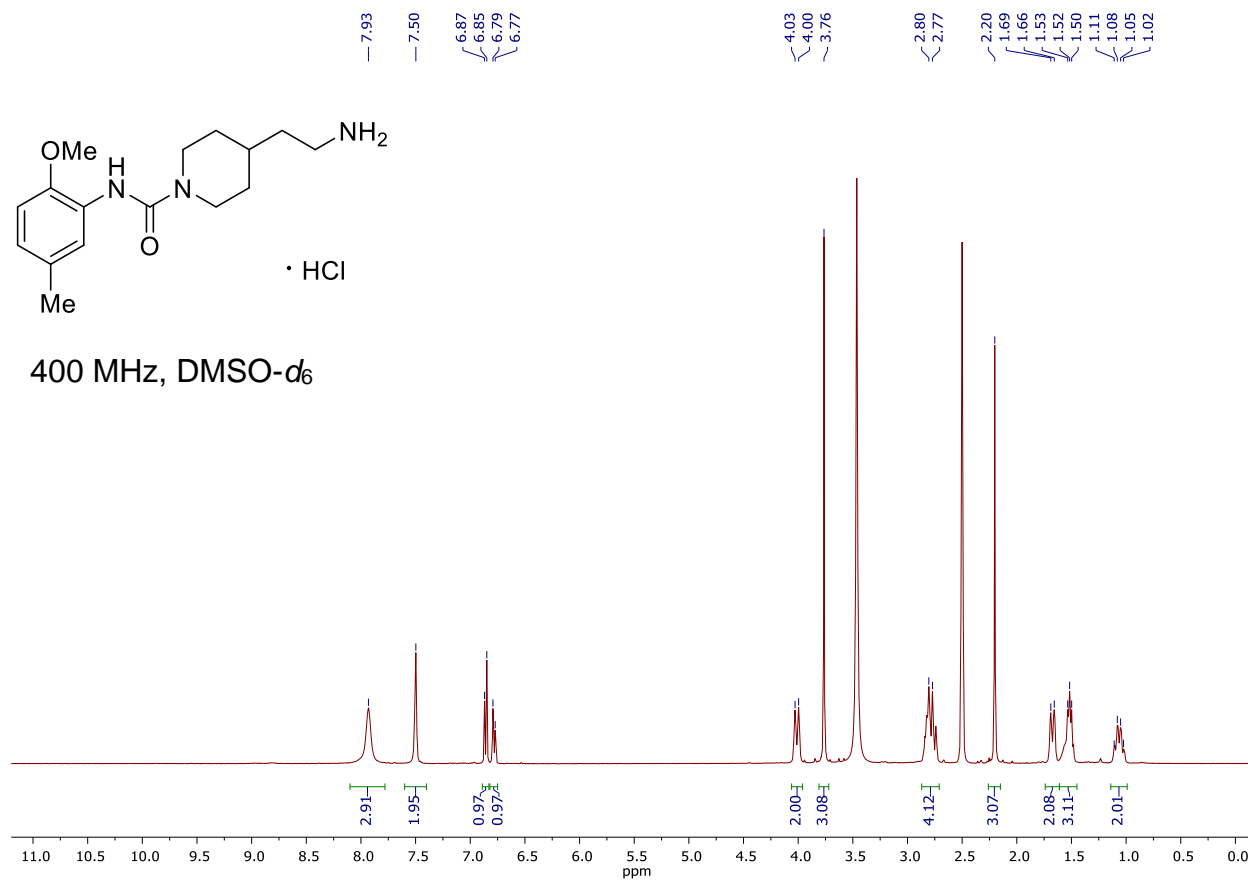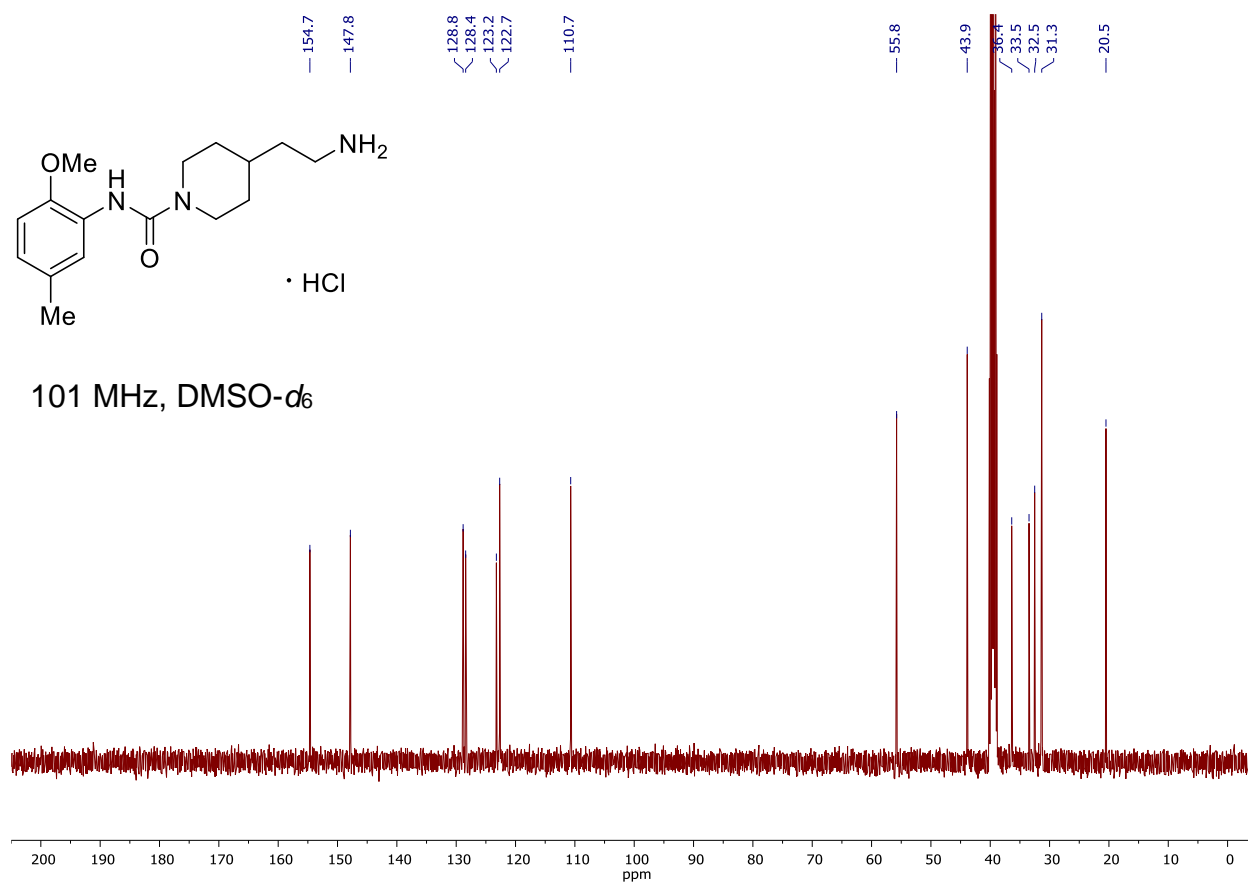

$^1\text{H}$  and  $^{13}\text{C}$  NMR spectra of compound **23**

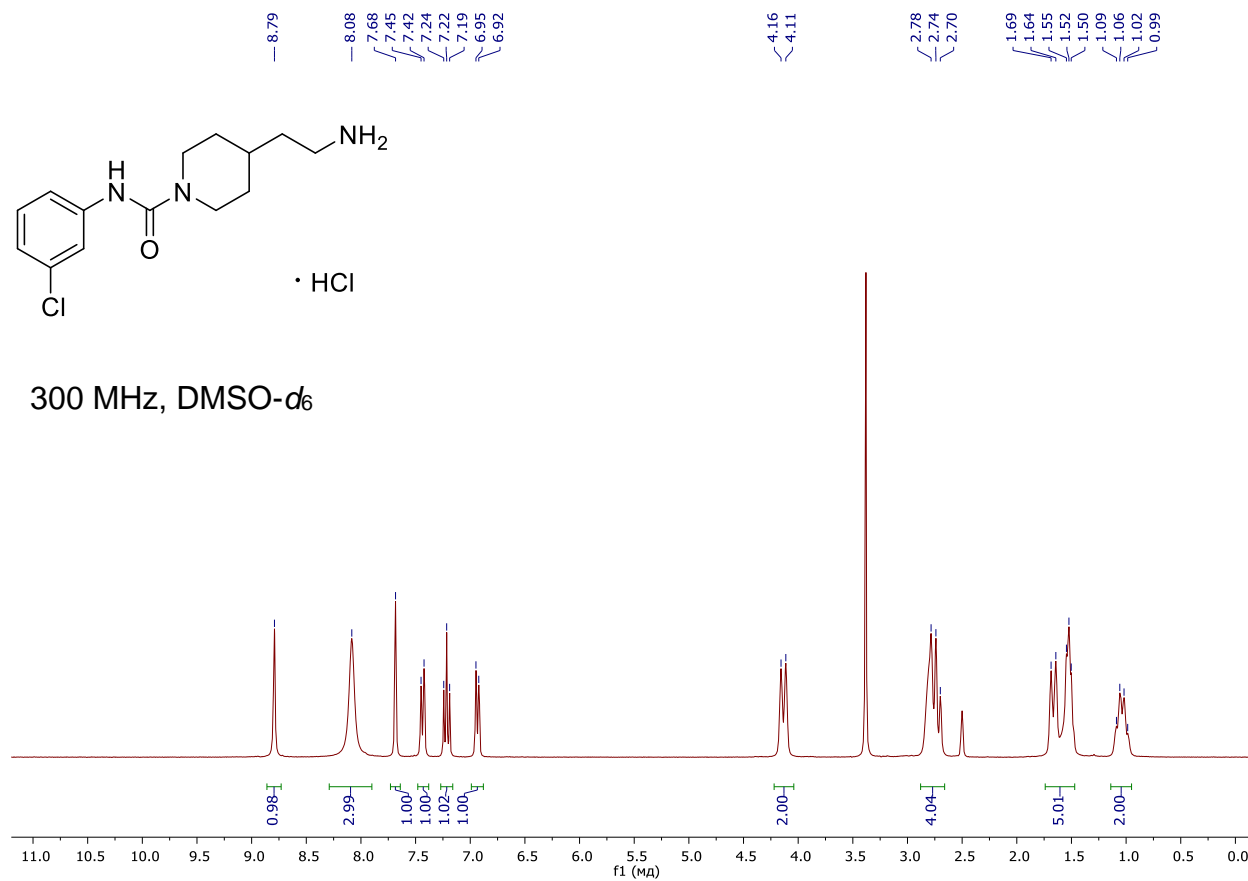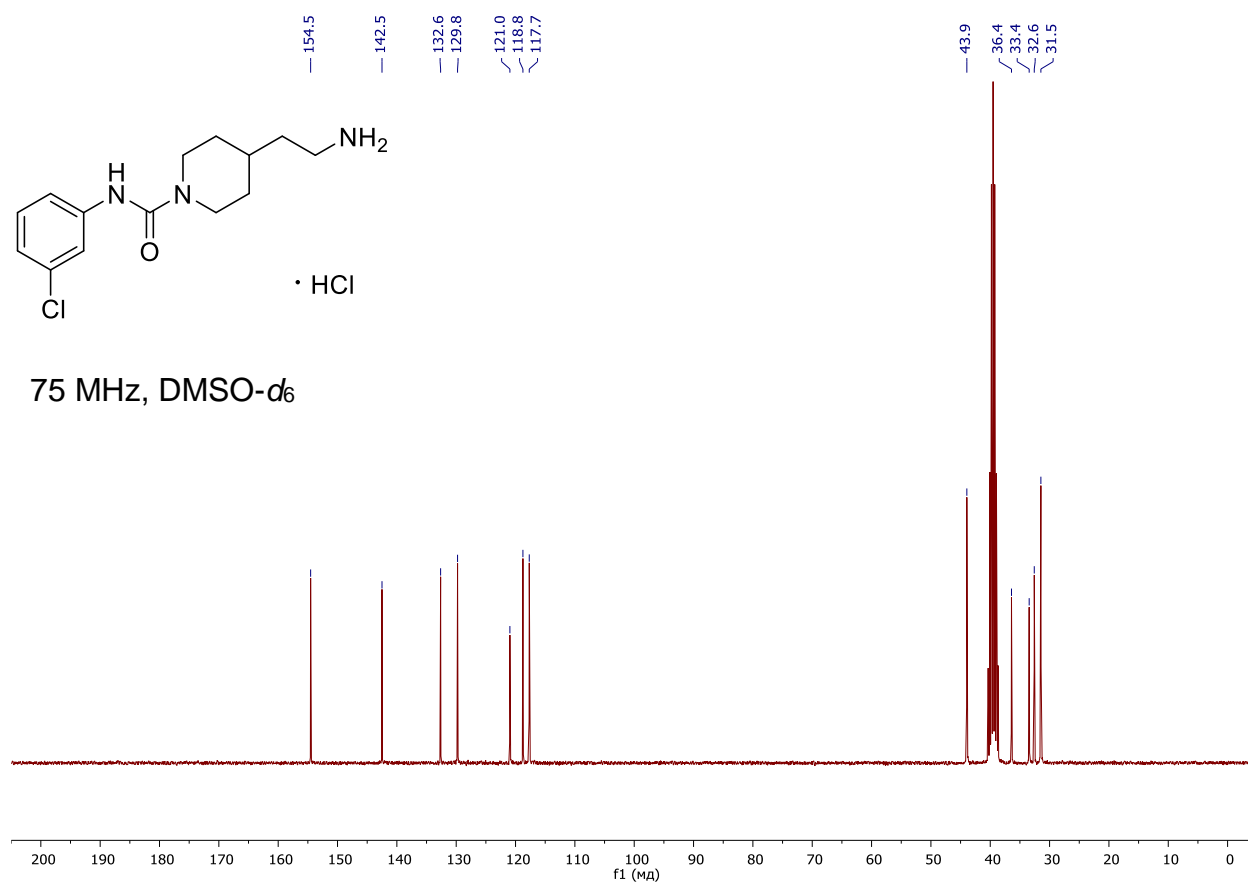

$^1\text{H}$  and  $^{13}\text{C}$  NMR spectra of compound **24**

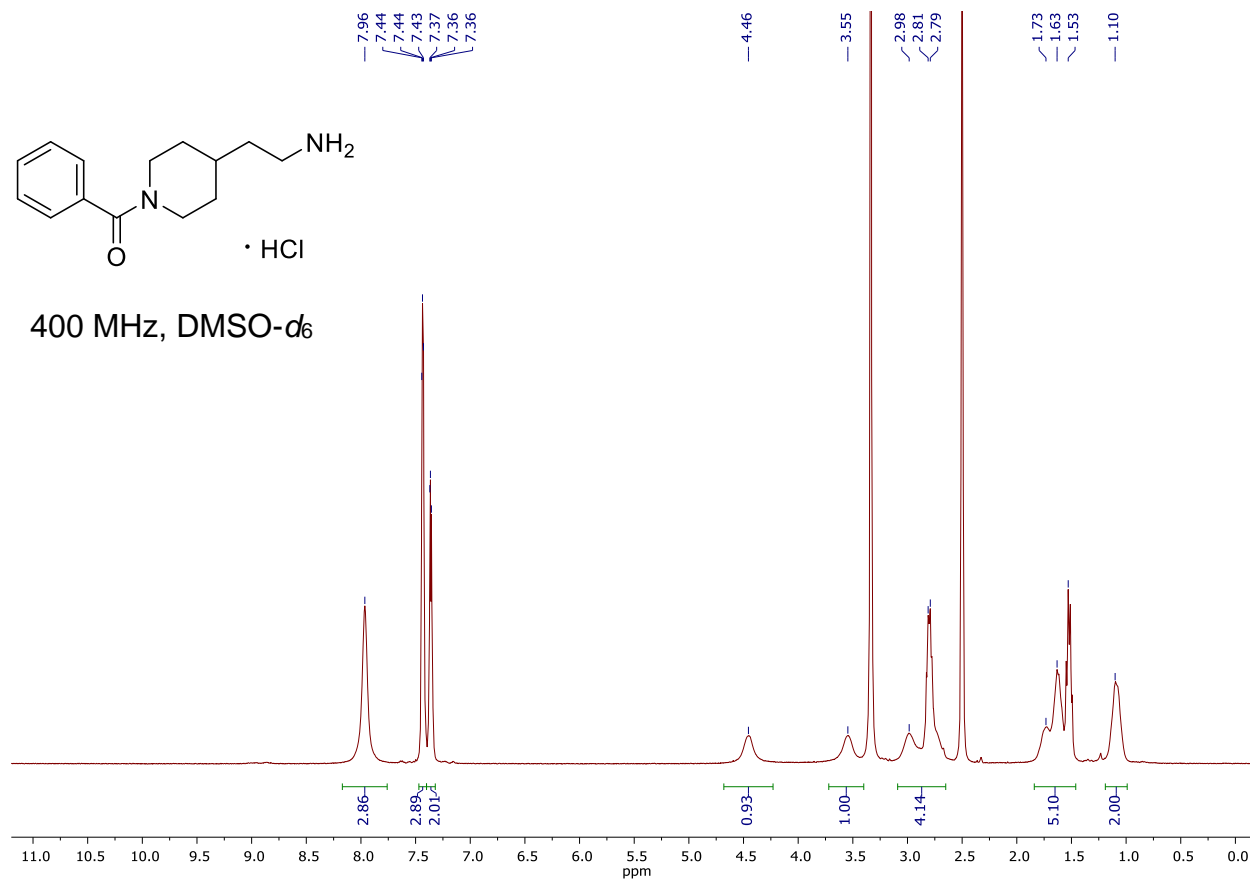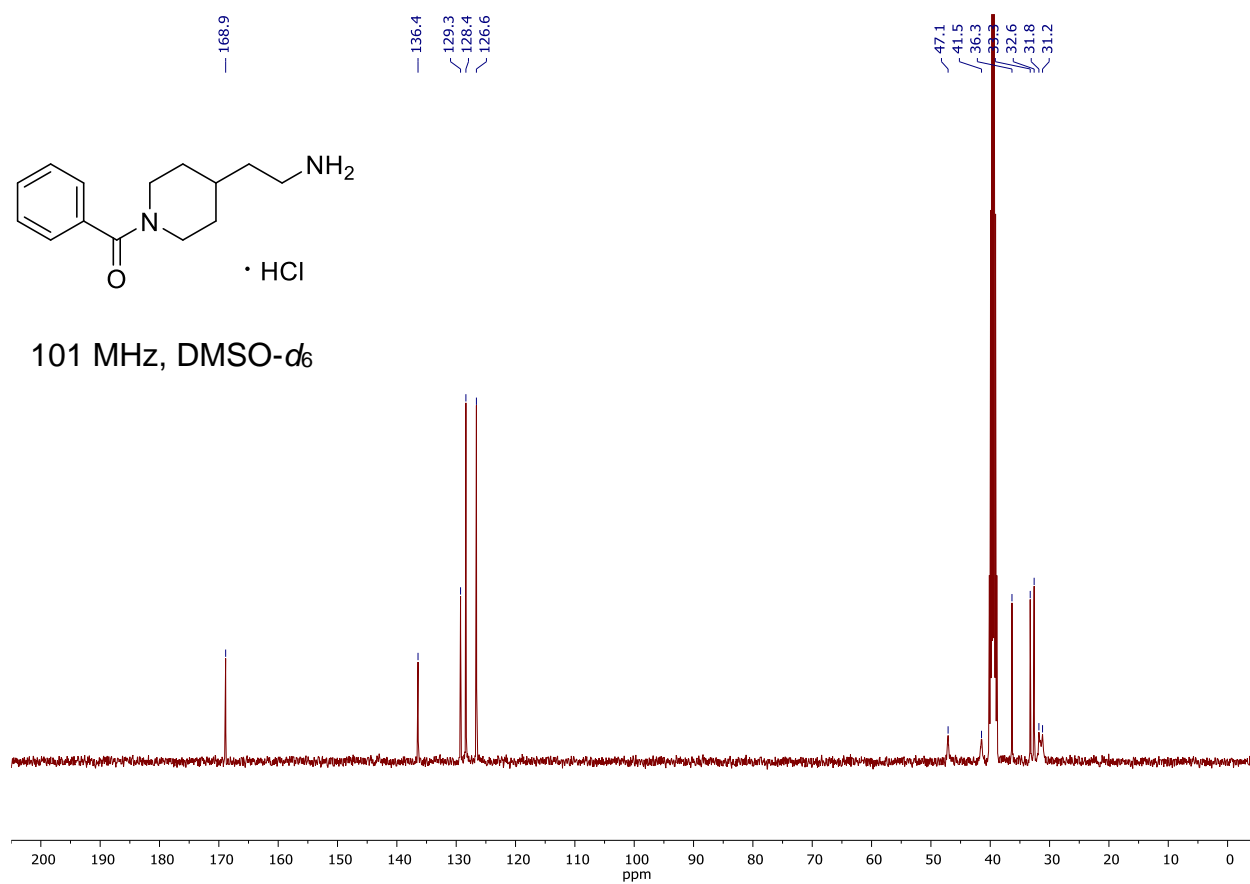

$^1\text{H}$  and  $^{13}\text{C}$  NMR spectra of compound **25**

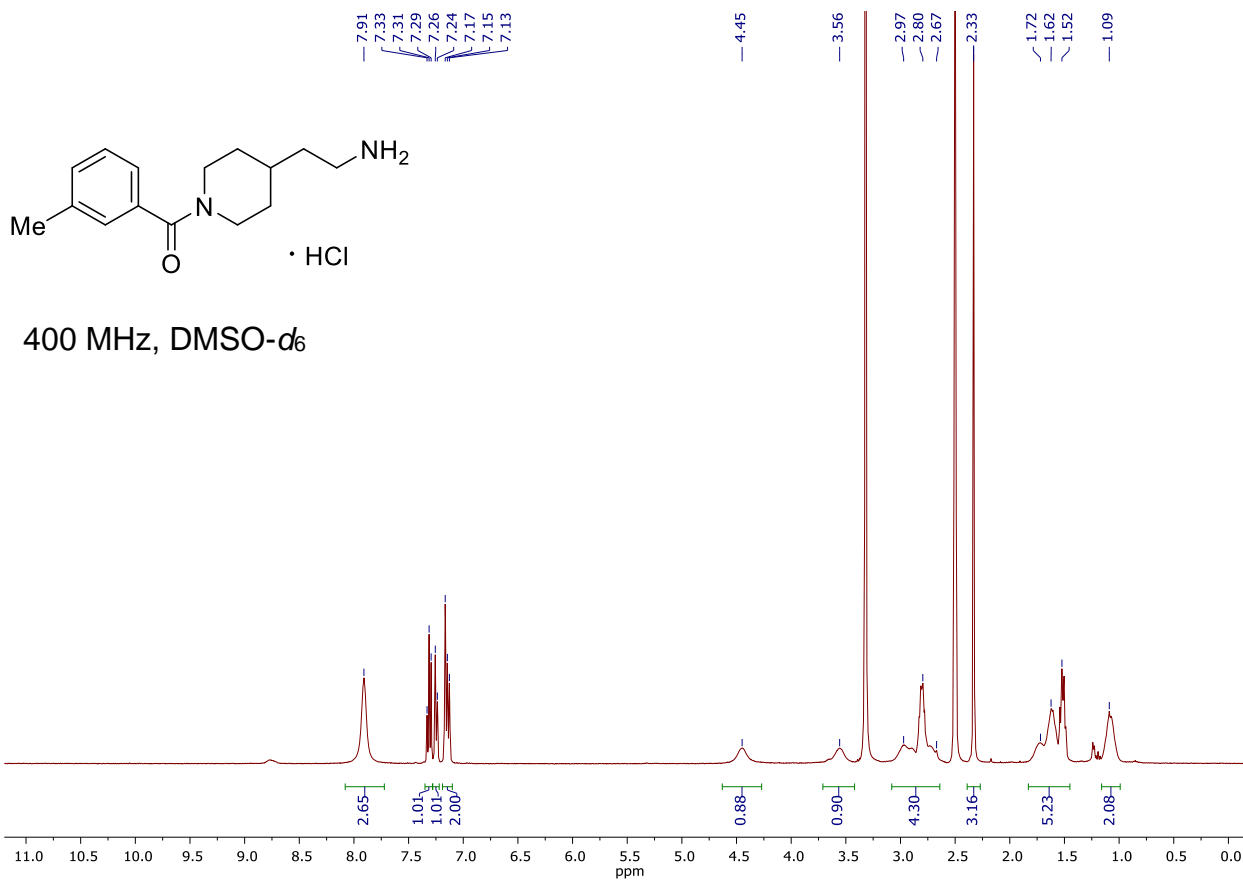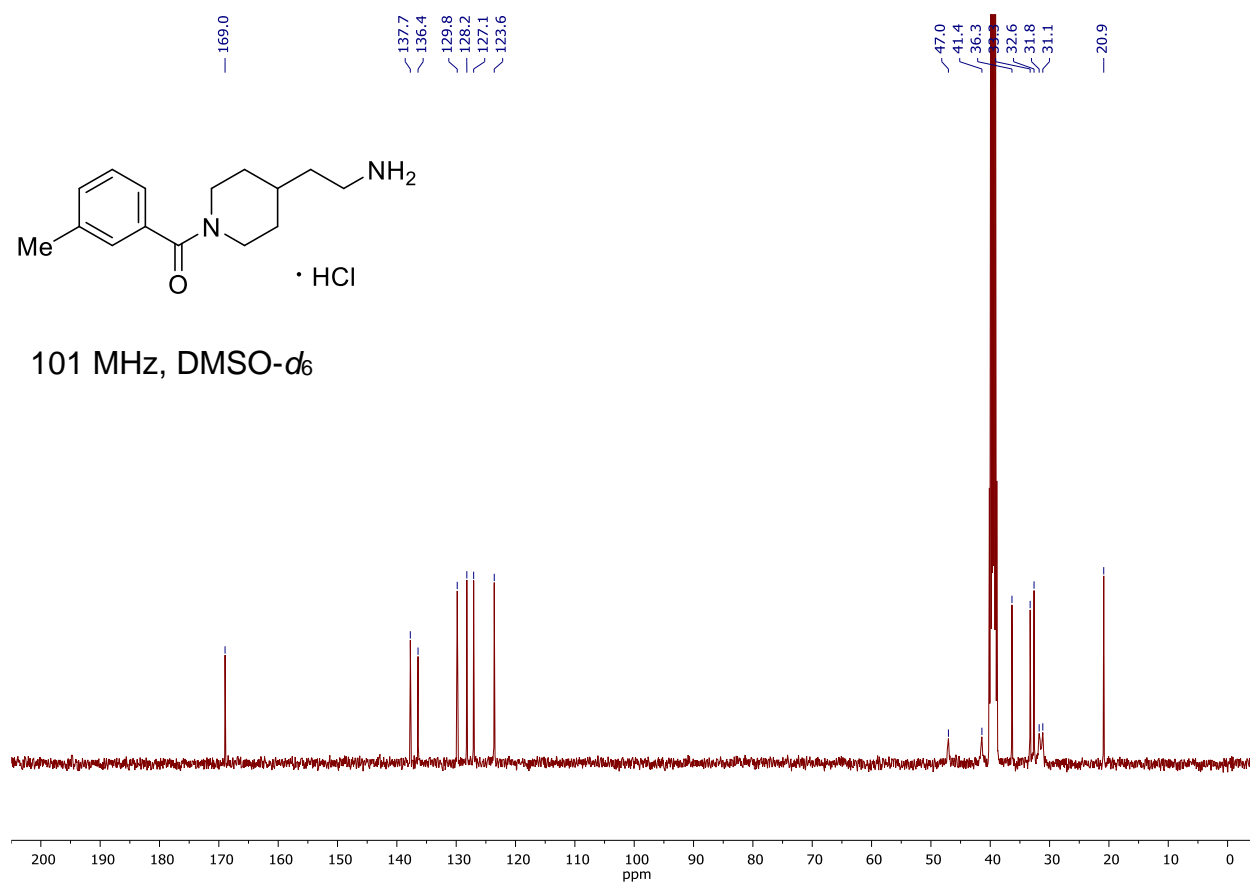

$^1\text{H}$  and  $^{13}\text{C}$  NMR spectra of compound **26**

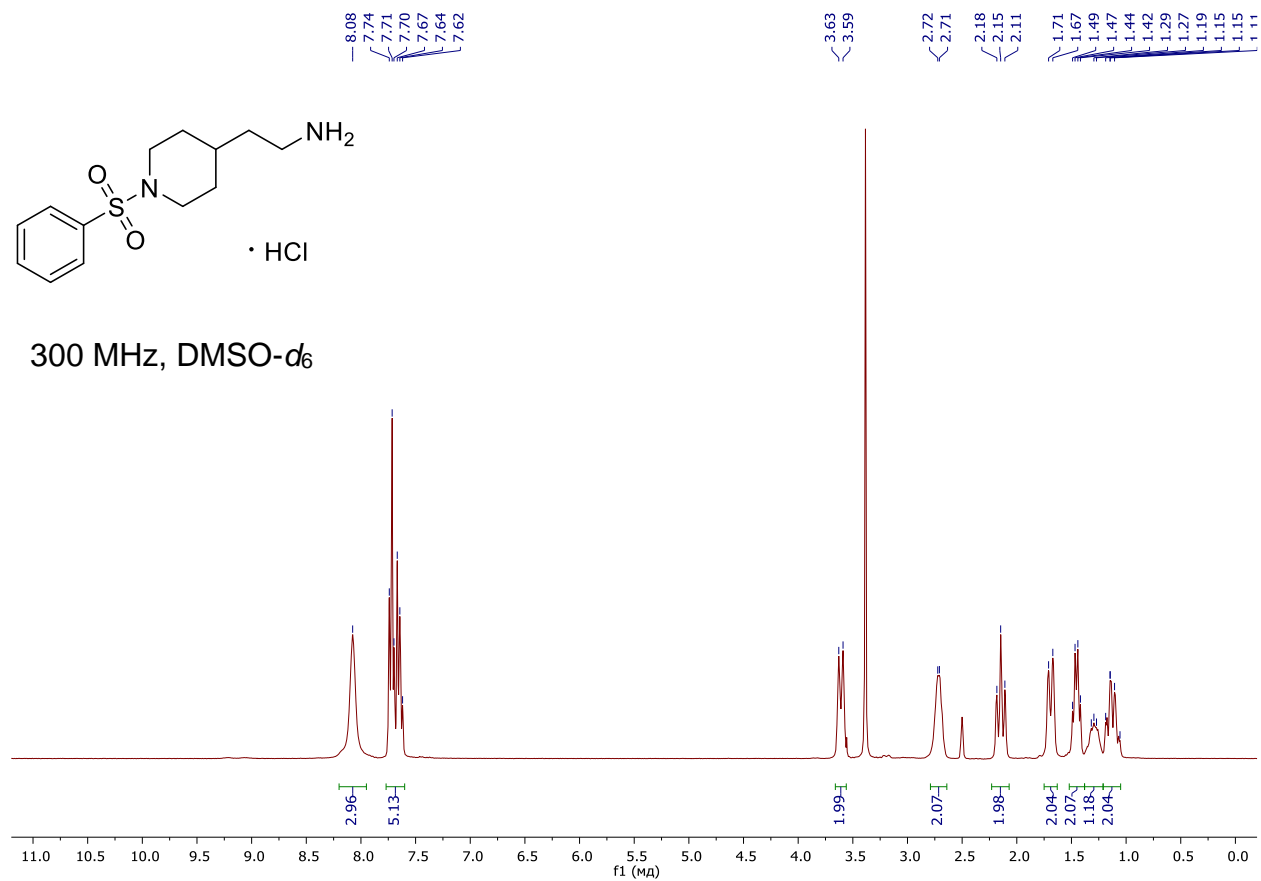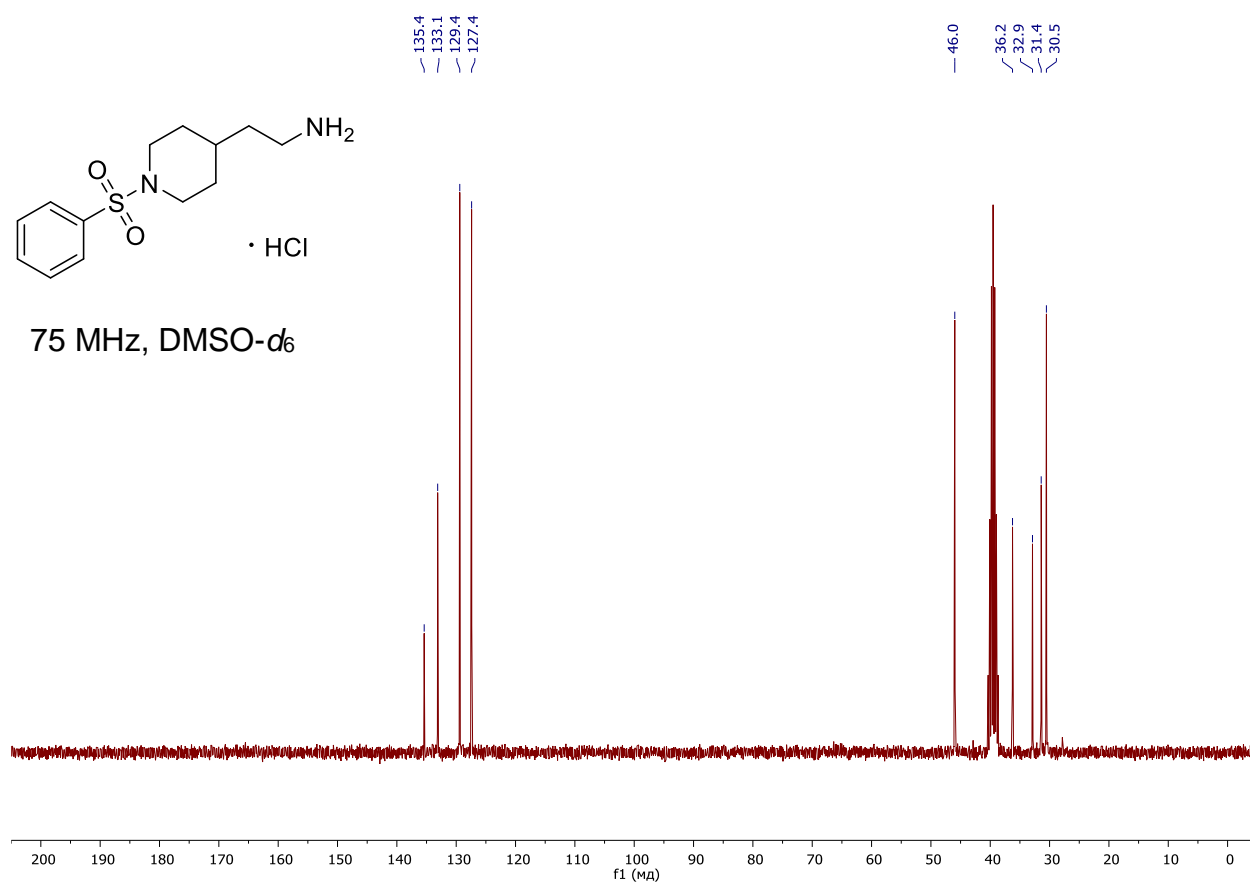

$^1\text{H}$  and  $^{13}\text{C}$  NMR spectra of compound **27**

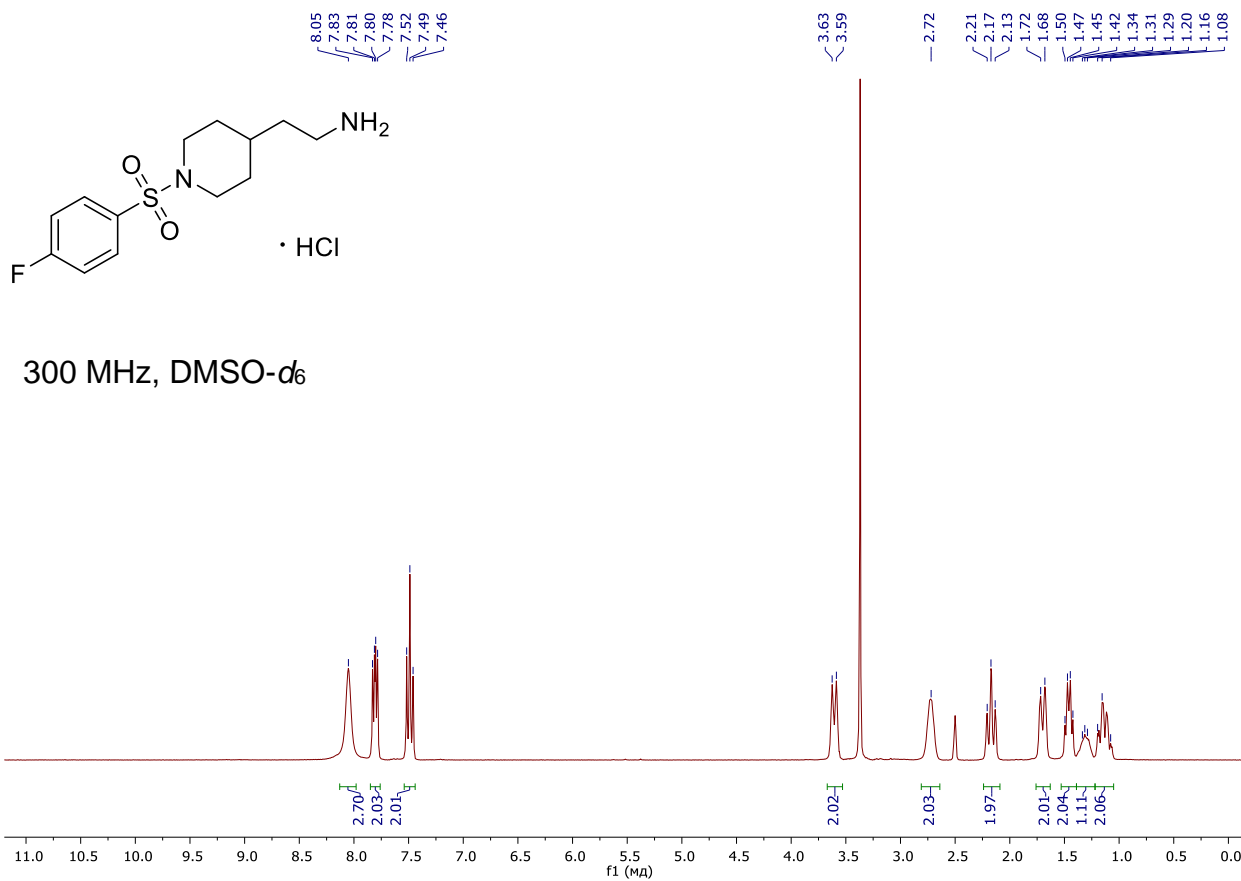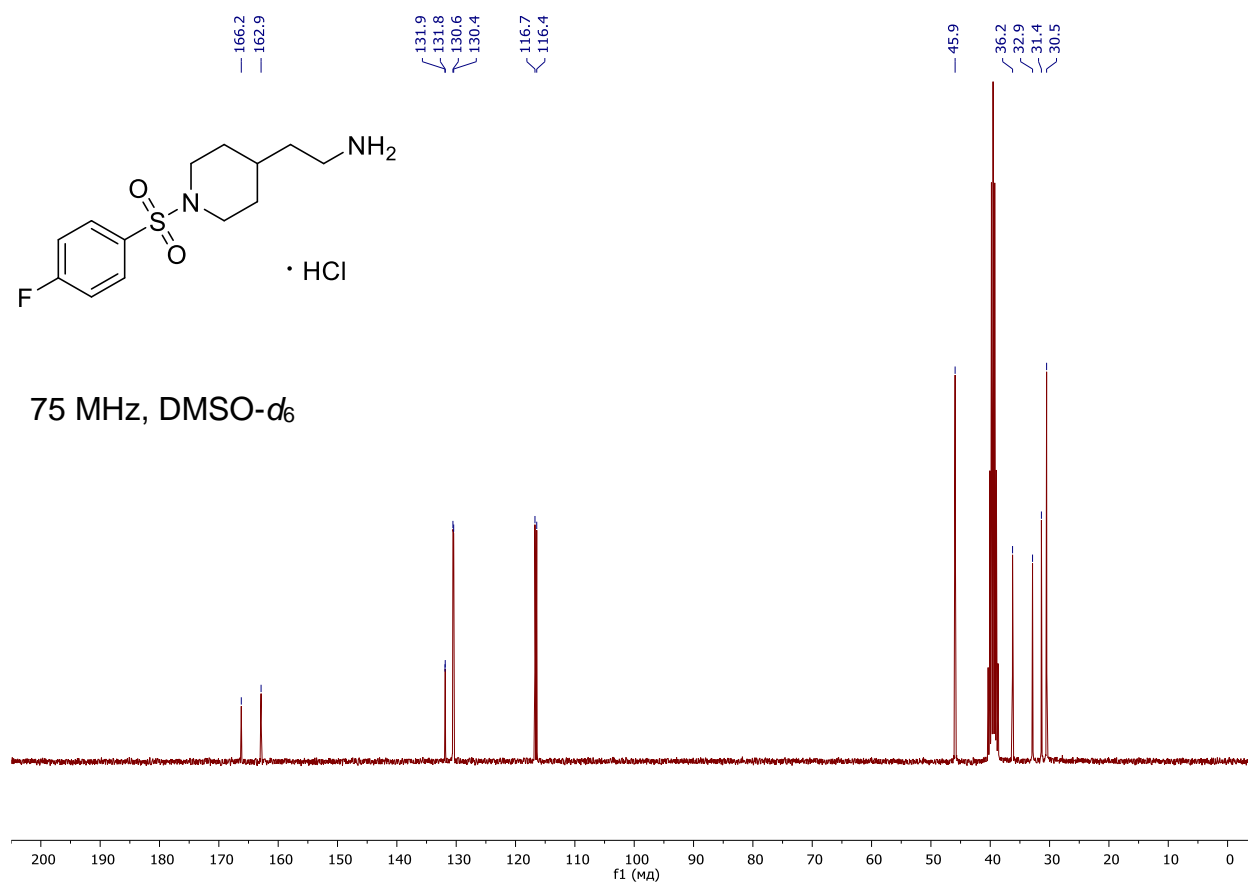

$^1\text{H}$  and  $^{13}\text{C}$  NMR spectra of compound **28**

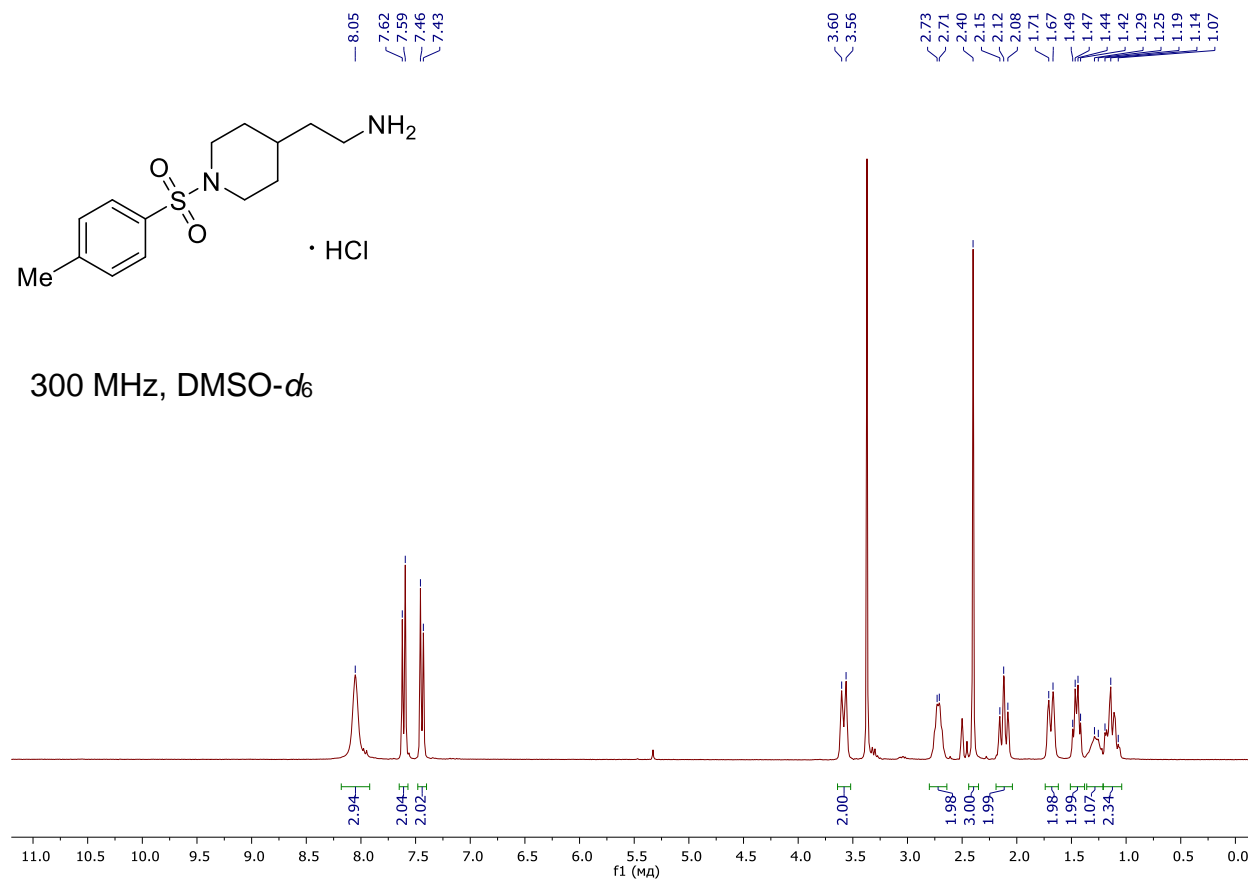



$^1\text{H}$  and  $^{13}\text{C}$  NMR spectra of compound **29**

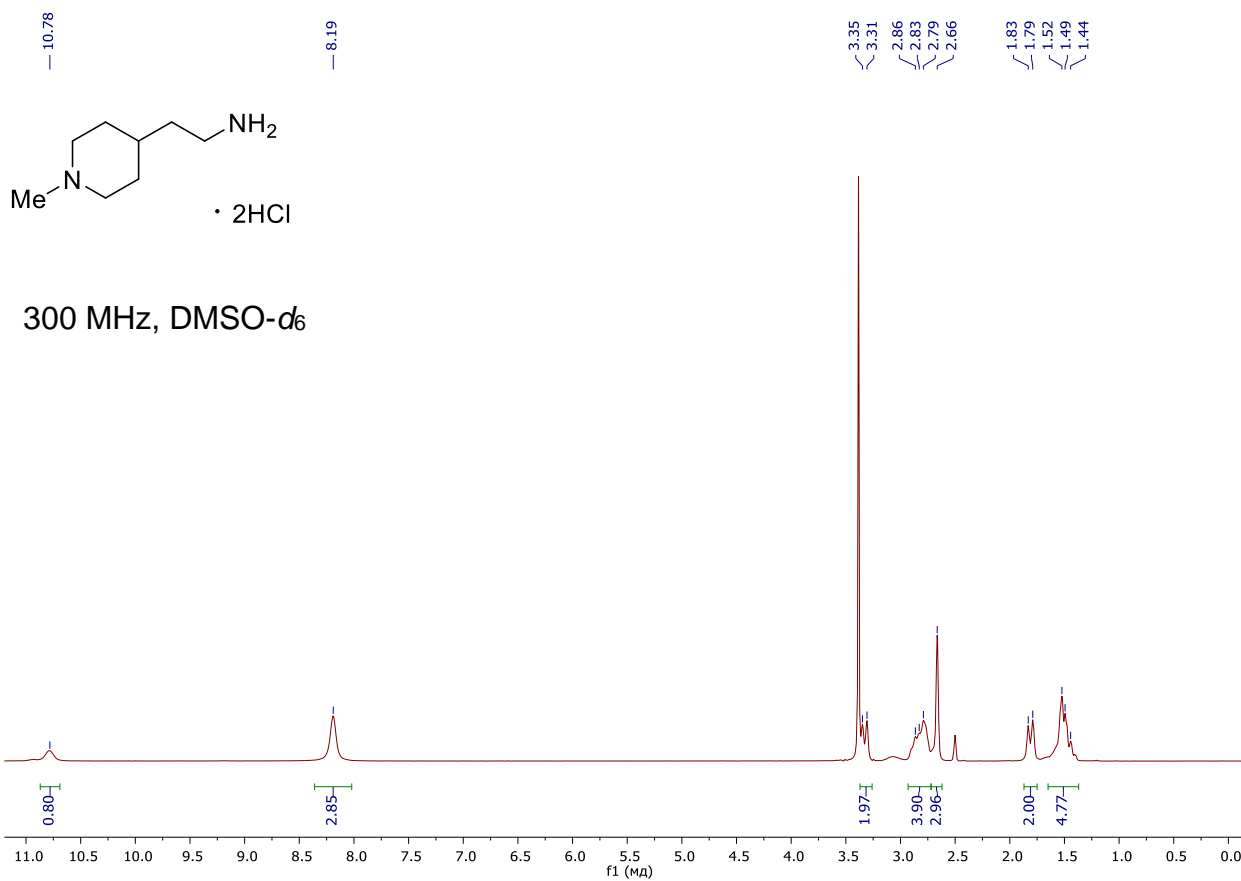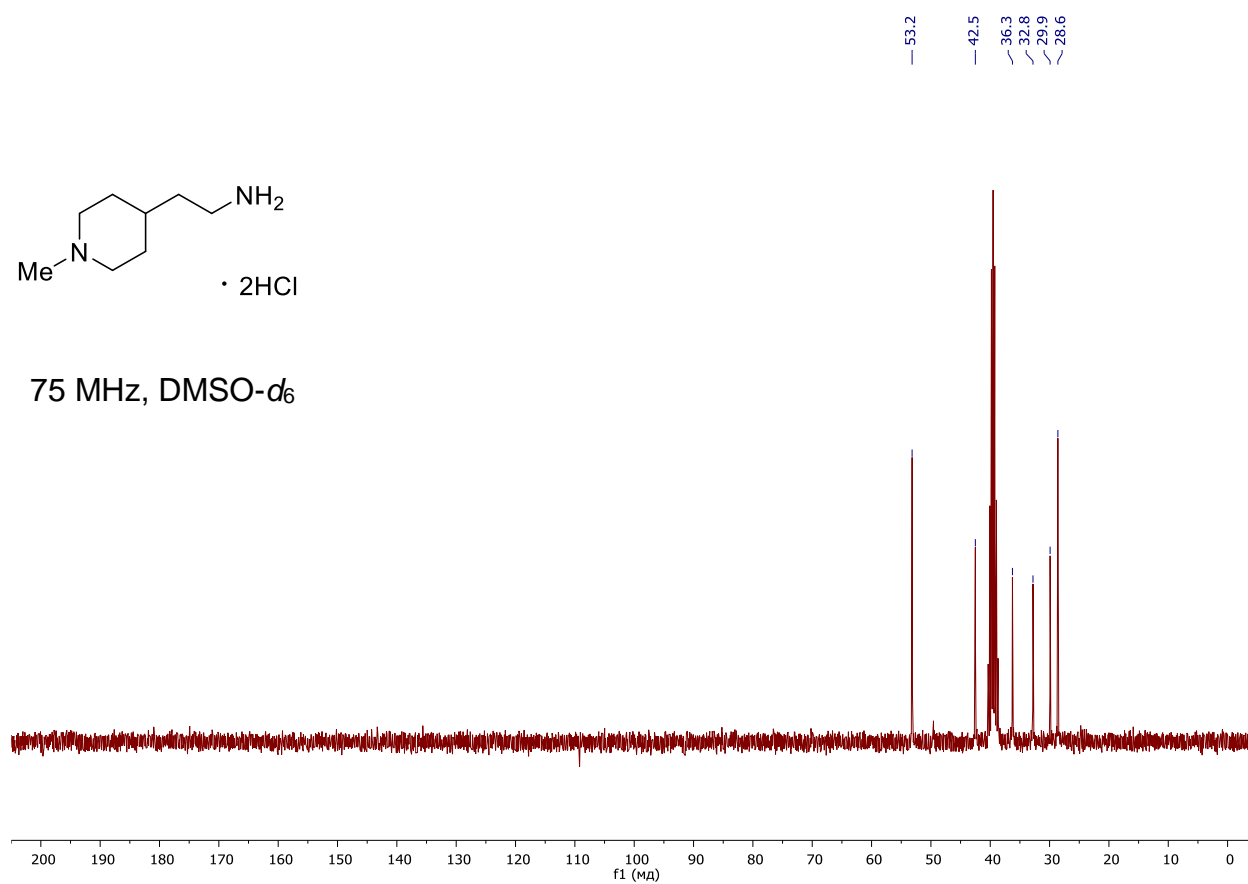

Calculated ADMET report from [www.swissadme.ch](http://www.swissadme.ch) for compound **18**

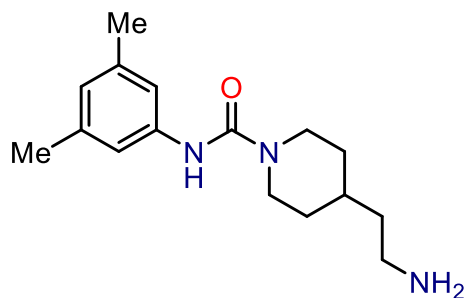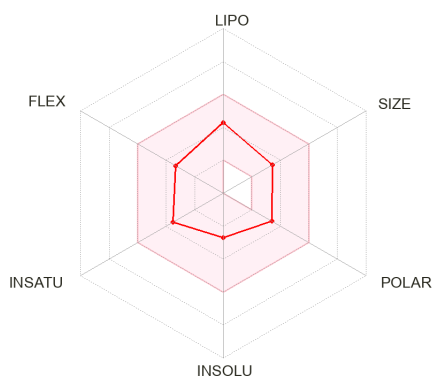

SMILES NCCCCCN(CCC1)C(=O)Nc1cc(C)cc(c1)C

#### Physicochemical Properties

|                           |                                                  |
|---------------------------|--------------------------------------------------|
| Formula                   | C <sub>16</sub> H <sub>25</sub> N <sub>3</sub> O |
| Molecular weight          | 275.39 g/mol                                     |
| Num. heavy atoms          | 20                                               |
| Num. arom. heavy atoms    | 6                                                |
| Fraction Csp <sup>3</sup> | 0.56                                             |
| Num. rotatable bonds      | 5                                                |
| Num. H-bond acceptors     | 2                                                |
| Num. H-bond donors        | 2                                                |
| Molar Refractivity        | 87.32                                            |
| TPSA                      | 58.36 Å <sup>2</sup>                             |

#### Lipophilicity

|                                          |      |
|------------------------------------------|------|
| Log <i>P</i> <sub>o/w</sub> (iLOGP)      | 2.92 |
| Log <i>P</i> <sub>o/w</sub> (XLOGP3)     | 2.00 |
| Log <i>P</i> <sub>o/w</sub> (WLOGP)      | 2.32 |
| Log <i>P</i> <sub>o/w</sub> (MLOGP)      | 2.45 |
| Log <i>P</i> <sub>o/w</sub> (SILICOS-IT) | 2.19 |
| Consensus Log <i>P</i> <sub>o/w</sub>    | 2.38 |

#### Water Solubility

|                    |                                 |
|--------------------|---------------------------------|
| Log S (ESOL)       | -2.70                           |
| Solubility         | 5.50e-01 mg/ml ; 2.00e-03 mol/l |
| Class              | Soluble                         |
| Log S (Ali)        | -2.85                           |
| Solubility         | 3.87e-01 mg/ml ; 1.41e-03 mol/l |
| Class              | Soluble                         |
| Log S (SILICOS-IT) | -4.12                           |
| Solubility         | 2.11e-02 mg/ml ; 7.66e-05 mol/l |
| Class              | Moderately soluble              |

#### Pharmacokinetics

|                             |            |
|-----------------------------|------------|
| GI absorption               | High       |
| BBB permeant                | Yes        |
| P-gp substrate              | Yes        |
| CYP1A2 inhibitor            | No         |
| CYP2C19 inhibitor           | No         |
| CYP2C9 inhibitor            | No         |
| CYP2D6 inhibitor            | Yes        |
| CYP3A4 inhibitor            | No         |
| Log $K_p$ (skin permeation) | -6.56 cm/s |

#### Druglikeness

|                       |                  |
|-----------------------|------------------|
| Lipinski              | Yes; 0 violation |
| Ghose                 | Yes              |
| Veber                 | Yes              |
| Egan                  | Yes              |
| Muegge                | Yes              |
| Bioavailability Score | 0.55             |

#### Medicinal Chemistry

|                         |         |
|-------------------------|---------|
| PAINS                   | 0 alert |
| Brenk                   | 0 alert |
| Leadlikeness            | Yes     |
| Synthetic accessibility | 2.17    |
